# Supplementary material for: Pyrene-bridged acenaphthenes: synthesis and properties of a diacenaphtho[1,2-e:1′,2′-l]pyrene and its symmetrical nitrogen analogue
Source: Royal Society of Chemistry journal article supplement (doi:10.1039/d3ob01744c), 2023-01-01
Supplement: d3ob01744c1.pdf [file d3ob01744c1.pdf]

## Supporting Information

### Pyrene-bridged acenaphthenes: synthesis and properties of a diacenaphtho[1,2-e:1',2'-l]pyrene and its symmetrical nitrogen analogue

Jonas Polkaehn,<sup>a</sup> Peter Ehlers,<sup>a</sup> Alexander Villinger,<sup>a</sup> and Peter Langer<sup>\*a,b</sup>

<sup>a</sup> Institute of Chemistry, University Rostock, Albert-Einstein-Str. 3a, 18059 Rostock, Germany.

E-mail: peter.langer@uni-rostock.de; Fax: +49 381 498 6412; Tel: +49 381 498 6410

<sup>b</sup> Leibniz Institute of Catalysis (LIKAT) at the University Rostock, Albert-Einstein-Str. 29a, 18059 Rostock, Germany.

### Table of Contents

|                                                                             |    |
|-----------------------------------------------------------------------------|----|
| General information .....                                                   | 3  |
| Synthesis .....                                                             | 4  |
| Reaction schemes.....                                                       | 4  |
| Optimization tables.....                                                    | 5  |
| Reaction conditions and analytical data.....                                | 7  |
| X-Ray data.....                                                             | 14 |
| Measurements .....                                                          | 15 |
| Absorption and Emission spectra.....                                        | 15 |
| Cyclic and differential pulse voltammetry.....                              | 16 |
| DFT Calculations .....                                                      | 17 |
| Cartesian coordinates of the optimized ground-states (S <sub>0</sub> )..... | 17 |
| TD-DFT calculations .....                                                   | 28 |
| 1H-, 13C- and NOESY-NMR Spectra of unknown compounds.....                   | 29 |
| References .....                                                            | 36 |



## General information

The nuclear magnetic resonance spectra ( $^1\text{H}/^{13}\text{C}$ ) were recorded on a Bruker AVANCE 300 III, 250 II, or 500. The analyzed chemical shifts  $\delta$  are referenced to residual solvents signals of the deuterated solvents  $\text{CDCl}_3$  ( $\delta = 7.26 \text{ ppm}/77.0 \text{ ppm}$ ) and  $\text{DMSO-d}_6$  ( $\delta = 2.50 \text{ ppm}/39.5 \text{ ppm}$ ). Multiplicities due to spin-spin correlation are reported as follows, s = singlet, d = doublet, dd = double doublet, t = triplet, m = multiplet, and further described through their coupling constants  $J$ . Infrared spectra (IR) were measured as attenuated total reflection (ATR) experiments with a Nicolet 380 FT-IR spectrometer. The signals have been characterized through their wave numbers  $\tilde{\nu}$  and their corresponding absorption as very strong (vs), strong (s), medium (m) or weak (w). UV/Vis spectra were recorded on a Cary 60 UV-vis spectrophotometer and emission spectra with an Agilent Cary Eclipse fluorescence spectrophotometer. Cyclic voltammograms were measured at room temperature in DCM ( $c = 10^{-4} \text{ M}$ ) with  $0.1 \text{ M n-Bu}_4\text{NPF}_6$  as a supporting electrolyte, glassy carbon working electrode, ANE2 ( $\text{Ag}/\text{AgNO}_3 \text{ } 0.01 \text{ M in } \text{CH}_3\text{CN}$ ) as reference electrode and Pt counter-electrode ( $0.5 \text{ mm diameter platinum wire}$ ) with ferrocene ( $c = 10^{-3} \text{ M, in } \text{CH}_3\text{CN}$ ) as an external standard at a scan rate of  $100 \text{ mV/s}$ . The potentiostat used was a Parstat 4000 from Ametek. The working electrode is a  $3 \text{ mm diameter}$  (length  $80, 6.35 \text{ mm outer diameter}$ ) glassy carbon disk electrode in a Kel-F coating that was polished on a polishing pad in aqueous alumina slurry ( $0.03 \mu\text{m}$  aluminapowder). The solvents were deoxygenated by purging with argon. The potential is given vs  $\text{Fc}/\text{Fc}^+$ . The direction of scan is reductive with a starting potential of  $1.5 \text{ V}$  and a switching potential of  $-1.8 \text{ V}$ . CVs are plotted using the IUPAC convention and shown in the range between  $-2.0$  and  $2.0 \text{ V}$ . Basic and high-resolution mass spectra (MS/HRMS) were measured on instruments which are paired with a preceding gas chromatograph (GC) or liquid chromatograph (LC). The samples have been ionized through electron impact ionization (EI) on an Agilent 6890/5973 or Agilent 7890/5977 GC-MS equipped with a HP-5 capillary column using helium carrier gas or by applying electron spray ionization (ESI) on an Agilent 1200/6210 Time-of-Flight (TOF) LC-MS. Melting points (mp) were determined by a Micro-Hot-Stage Galen<sup>TM</sup> III Cambridge Instruments and are not corrected. X-ray single-crystal structure analysis was performed on a Bruker Apex Kappa-II CCD diffractometer.

# Synthesis

## Reaction schemes

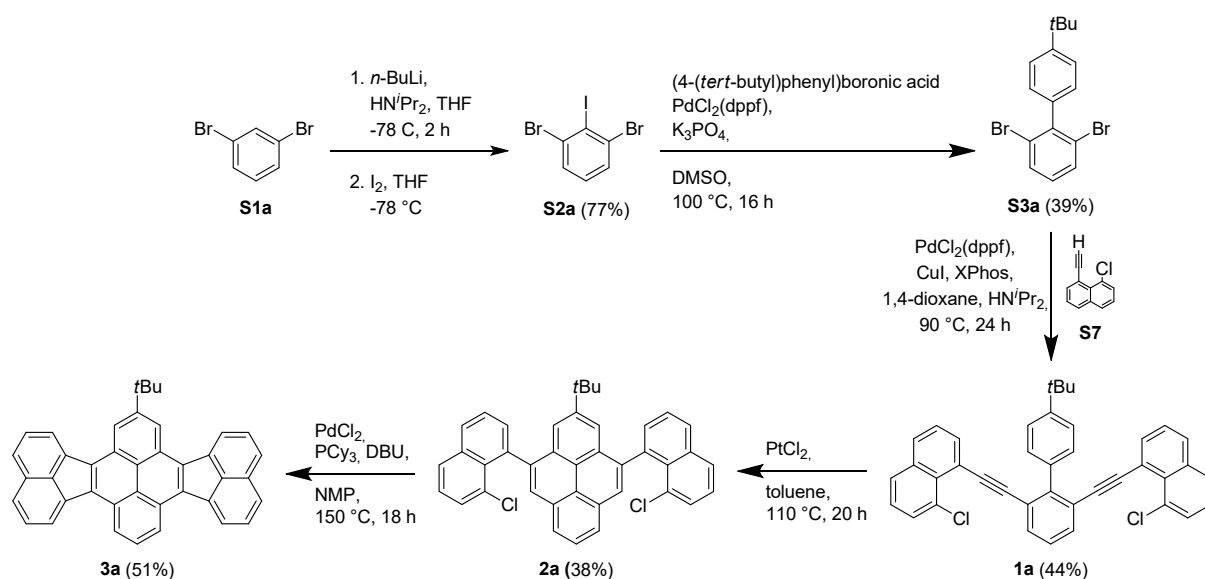

Scheme S1: Synthesis of 8-(*tert*-butyl)diacenaphtho[1,2-*e*:1',2'-*l*]pyrene (**3a**)

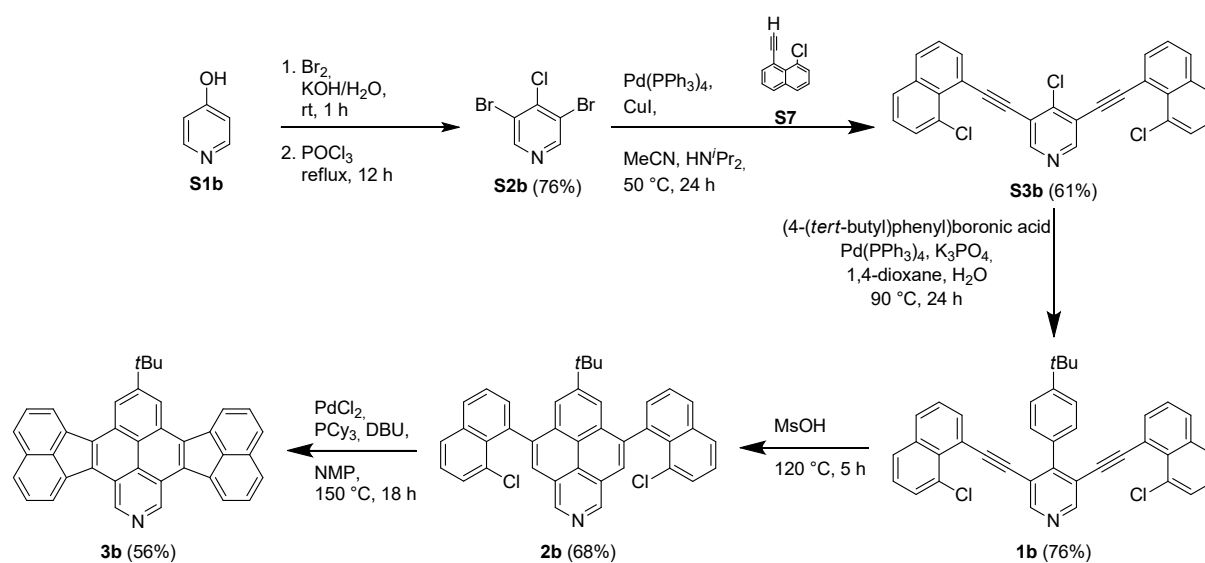

Scheme S2: Synthesis of 17-(*tert*-butyl)acenaphtho[1',2':3,4]naphtho[2,1,8-def]acenaphtho[1,2-*h*]isoquinoline (**3b**)

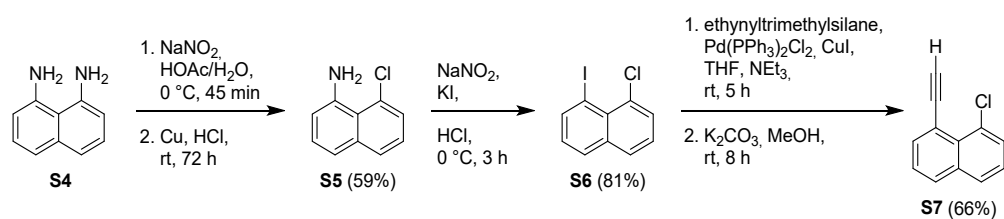

Scheme S3: Synthesis of 1-chloro-8-ethynynaphthalene (**S7**)

## Optimization tables

Table S1: Optimization of Suzuki reaction for **S3a**; *i*: (4-(tert-butyl)phenyl)boronic acid (1.5 eq.), [Pd] (0.05 eq.), base (2 eq.), solvent, *T*, *t*.

| Nr | [Pd]                                            | base                           | solvent              | <i>T</i> [°C] | <i>t</i> [h] | yield <sup>a</sup> [%] |
|----|-------------------------------------------------|--------------------------------|----------------------|---------------|--------------|------------------------|
| 1  | Pd(dppf)Cl                                      | K <sub>3</sub> PO <sub>4</sub> | DMSO                 | 100           | 24           | 39                     |
| 2  | <sup>2</sup> Pd(dppf)Cl                         | K <sub>3</sub> PO <sub>4</sub> | DMSO                 | 60            | 24           | 16                     |
| 3  | <sup>2</sup> Pd(PPh <sub>3</sub> ) <sub>4</sub> | K <sub>3</sub> PO <sub>4</sub> | THF/H <sub>2</sub> O | 80            | 24           | 34                     |

<sup>a</sup> isolated yield

Table S2: Optimization of Sonogashira reaction for **1a**; *i*: [Pd] (0.05 eq.), **S7**, ligand (0.1 eq.), CuI (0.05 eq.), solvent, *T*, *t*.

| Nr | [Pd]                 | eq. <b>S7</b> | ligand            | solvent                                     | <i>T</i> [°C] | <i>t</i> [h] | yield <sup>a</sup> [%] |
|----|----------------------|---------------|-------------------|---------------------------------------------|---------------|--------------|------------------------|
| 1  | Pd(OAc)              | 3             | XPho              | 1,4-dioxane/HN <sup>i</sup> Pr <sub>2</sub> | 90            | 24           | 36                     |
| 2  | <sup>2</sup> Pd(OAc) | 3             | <sup>s</sup> XPho | toluene/HN <sup>i</sup> Pr <sub>2</sub>     | 100           | 24           | 44                     |

<sup>a</sup> isolated yield

Table S3: Optimization of Suzuki reaction for **1b**; *i*: (4-(tert-butyl)phenyl)boronic acid, [Pd] (0.05 eq.), base (2 eq.), solvent, *T*, *t*.

| Nr             | [Pd]                               | eq. boronic acid | base                           | solvent                      | <i>T</i> [°C] | <i>t</i> [h] | yield <sup>a</sup> [%] |
|----------------|------------------------------------|------------------|--------------------------------|------------------------------|---------------|--------------|------------------------|
| 1 <sup>1</sup> | Pd(PPh <sub>3</sub> ) <sub>4</sub> | 2                | K <sub>3</sub> PO <sub>4</sub> | 1,4-dioxane/H <sub>2</sub> O | 90            | 24           | 42                     |

---

|   |                                    |     |                                |                              |    |    |    |
|---|------------------------------------|-----|--------------------------------|------------------------------|----|----|----|
| 2 | Pd(PPh <sub>3</sub> ) <sub>4</sub> | 1.2 | K <sub>3</sub> PO <sub>4</sub> | 1,4-dioxane/H <sub>2</sub> O | 90 | 24 | 76 |
|---|------------------------------------|-----|--------------------------------|------------------------------|----|----|----|

---

<sup>a</sup> isolated yield

---

Table S4: Optimization of CH activation for **3b**; *i*: [Pd], ligand, additive, base, solvent, *T*, *t*.

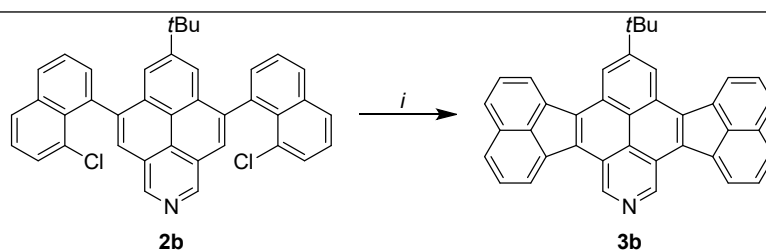

| Nr.            | [Pd]<br>(eq.)                                       | ligand<br>(eq.)                            | additive<br>(eq.) | base<br>(eq.)                          | solvent | <i>T</i><br>[°C] | <i>t</i><br>[h] | yield<br>[%] <sup>a</sup> |
|----------------|-----------------------------------------------------|--------------------------------------------|-------------------|----------------------------------------|---------|------------------|-----------------|---------------------------|
| 1 <sup>2</sup> | PdCl <sub>2</sub> (PhCN)<br>) <sub>2</sub><br>(0.1) | PCy <sub>3</sub><br>(0.2)                  | PivOH<br>(0.4)    | Cs <sub>2</sub> CO <sub>3</sub><br>(2) | DMA     | 150              | 18              | -                         |
| 2 <sup>3</sup> | Pd(OAc) <sub>2</sub><br>(1)                         | PCy <sub>3</sub> HBF <sub>4</sub><br>(0.2) | -                 | K <sub>2</sub> CO <sub>3</sub><br>(6)  | DMA     | 130              | 48              | -                         |
| 3              | Pd <sub>2</sub> (dba) <sub>3</sub><br>(0.2)         | -                                          | -                 | K <sub>3</sub> PO <sub>4</sub><br>(10) | DMF     | 140              | 18              | -                         |
| 4 <sup>4</sup> | PdCl <sub>2</sub><br>(0.4)                          | PCy <sub>3</sub><br>(0.8)                  | -                 | DBU<br>(6)                             | NMP     | 150              | 18              | 56                        |

<sup>a</sup> isolated yield,

Reaction conditions and analytical data

### 1,3-dibromo-2-iodobenzene (**S2a**)

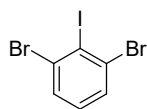

According to literature-known procedure **S2a** was synthesized starting from 1,3-dibromobenzene (**S1a**).<sup>5</sup> In a 250 ml Schlenk-flask 40 ml THF were cooled to -78 °C and 1 eq.  $\text{HN}^i\text{Pr}_2$  (21.2 mmol, 3 ml) and 1.025 eq. *n*-BuLi in hexane (2.5 M, 21.7 mmol, 8.7 ml) was added to generate LDA *in-situ*. The mixture was stirred for 30 min. and 1 eq. (21.2 mmol, 5 g) 1,3-dibromobenzen was slowly added. The mixture was stirred for 2 h at -78 °C and quenched with 1.05 eq. iodine (22.25 mmol, 5.65 g) dissolved in 15 ml THF. The solution was washed with sat.  $\text{Na}_2\text{S}_2\text{O}_3$ -solution to remove excess of iodine and extracted with EtOAc. The organic phase was dried over  $\text{Na}_2\text{SO}_4$ . The solvent was distilled off in *vacuo* and the residue was purified by column chromatography with heptane to give colorless **S2a** in yield of 91% (6.97 g, 19.3 mmol). The spectral data are in accordance with the literature.<sup>5</sup>

**<sup>1</sup>H NMR** (300 MHz,  $\text{CDCl}_3$ )  $\delta$  = 7.55 (d,  $J$  = 8.0 Hz, 2H), 7.06 (t,  $J$  = 8.0 Hz, 1H). **<sup>13</sup>C NMR** (75 MHz,  $\text{CDCl}_3$ )  $\delta$  = 131.3 (C), 131.1, 130.3 (CH), 109.3 (C).

### 3,5-dibromo-4-chloropyridine (**S2b**)

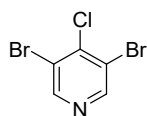

According to literature-known procedure **S2b** was synthesized starting from pyridin-4-ol (**S1b**).<sup>1</sup> 5.14 g (54.0 mmol) of **S1b** and 2 eq. (108.0 mmol, 6.1 g) KOH were dissolved in 100 ml  $\text{H}_2\text{O}$  and cooled to 0 °C, then 2 eq. (108.0 mmol, 17.3 g, 5.6 ml) bromine was added dropwise. The mixture was stirred for 30 min, the precipitate was filtered off, washed with  $\text{H}_2\text{O}$  and dried in *vacuo*. The precipitate was dissolved in 50 ml  $\text{POCl}_3$  and stirred in an oil bath under reflux for 12 h. The mixture was quenched with ice, neutralized with sat.  $\text{NaHCO}_3$ -solution and extracted with DCM. The organic phases were dried over  $\text{Na}_2\text{SO}_4$ . The solvent was distilled off in *vacuo* and the residue was purified by column chromatography with heptane/ethyl acetate (10:1,  $R_f$  = 0.44) to give **S2b** as a colorless solid in 76% (11.12 g, 41.0 mmol) yield. The spectral data are in accordance with the literature.<sup>1</sup>

**<sup>1</sup>H NMR** (300 MHz,  $\text{CDCl}_3$ )  $\delta$  = 8.65 (s, 2H). **<sup>13</sup>C NMR** (75 MHz,  $\text{CDCl}_3$ )  $\delta$  = 150.8 (CH), 144.1 (C), 121.8 (C).



### 8-chloronaphthalen-1-amine (**S5**)

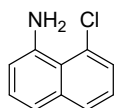

According to literature-known procedures **S5** was synthesized starting from 1,8-diaminonaphthalene (**S4**).<sup>6,7</sup> 20 g (126.0 mmol) of **S4** was dissolved in a mixture of 240 ml HOAc and 175 ml H<sub>2</sub>O, 1.05 eq. (132.8 mmol, 9.16 g) NaNO<sub>2</sub> in 53 ml H<sub>2</sub>O was added to the solution. The mixture was diluted with 40 ml H<sub>2</sub>O and stirred at 0 °C for 45 min. The brown precipitate was filtered off, washed with H<sub>2</sub>O, dried and used directly for the next reaction.<sup>6</sup> The brown powder and 0.1 eq. (12.6 mmol, 800 mg) Cu-powder was added slowly to 300 ml ice-cooled conc. hydrochloric acid. The mixture was stirred for 72 h at room temperature, then ice was added, and the solution was treated with ammonia until the pH was about 11. The mixture was extracted with DCM and dried over Na<sub>2</sub>SO<sub>4</sub>. The solvent was distilled off in *vacuo* and the residue was purified by column chromatography with heptane/ethyl acetate (5:1, *R<sub>f</sub>* = 0.37) to give **S5** as a colorless solid in 59% (13.16 g, 74.0 mmol) yield.<sup>7</sup> The spectral data are in accordance with the literature<sup>8</sup>:

**<sup>1</sup>H NMR** (300 MHz, CDCl<sub>3</sub>) δ = 7.70 (dd, *J* = 8.2 Hz, *J* = 1.4 Hz, 1H), 7.42 (dd, *J* = 7.4 Hz, *J* = 1.4 Hz, 1H), 7.35 – 7.27 (m, 3H), 6.76 (dd, *J* = 6.8 Hz, *J* = 2.0 Hz, 1H), 5.06 (s, 2H).  
**<sup>13</sup>C NMR** (75 MHz, CDCl<sub>3</sub>) δ = 143.7, 137.4, 129.5 (C), 128.4, 127.5, 127.1, 125.2 (CH), 120.1 (C), 118.8, 112.2 (CH).

### 1-chloro-8-iodonaphthalene (**S6**)

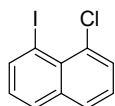

According to literature-known procedure **S6** was synthesized.<sup>9</sup> 3 g (16.9 mmol) of **S5** was suspended in 57 ml HCl (2 M) and 1.5 eq. (25.4 mmol, 1.75 g) NaNO<sub>2</sub> in 17 ml H<sub>2</sub>O was slowly added at 0 °C. After stirring for 30 min, 4 eq. (67.6 mmol, 11.2 g) KI in 17 ml H<sub>2</sub>O was added. The mixture was stirred 3 h at room temperature and was quenched with sat. NaHCO<sub>3</sub> and sat. Na<sub>2</sub>S<sub>2</sub>O<sub>3</sub>-solution. The mixture was extracted with DCM and dried over Na<sub>2</sub>SO<sub>4</sub>, the solvent was distilled off in *vacuo* and the residue was purified by column chromatography with heptane (*R<sub>f</sub>* = 0.54) to give **S6** as a yellow solid in 59% (3.95 g, 13.7 mmol) yield. The spectral data are in accordance with the literature<sup>9</sup>:

**<sup>1</sup>H NMR** (300 MHz, CDCl<sub>3</sub>) δ = 8.38 (dd, *J* = 7.4 Hz, *J* = 1.3 Hz, 1H), 7.82 (ddd, *J* = 8.1 Hz, *J* = 1.3 Hz, *J* = 0.5 Hz, 1H), 7.77 (ddd, *J* = 8.1 Hz, *J* = 1.4 Hz, *J* = 0.5 Hz, 1H), 7.66 (dd, *J* = 7.5 Hz, *J* = 1.4 Hz, 1H), 7.36 (dd, *J* = 8.2 Hz, *J* = 7.4 Hz, 1H), 7.07 (dd, *J* = 8.1 Hz, *J* = 7.4 Hz, 1H).  
**<sup>13</sup>C NMR** (75 MHz, CDCl<sub>3</sub>) δ = 144.1 (CH), 136.4, 131.6 (C), 130.4, 130.2 (CH), 129.5 (C), 129.3, 127.1, 125.8 (CH), 88.3 (C).

### 1-chloro-8-ethynyl-naphthalene (**S7**)

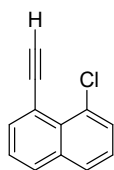

According to literature-known procedure **S7** was synthesized.<sup>9</sup> Under an Ar-atmosphere **S6** (3.9 g 13.5 mmol), 0.05 eq. (0.67 mmol, 471 mg) PdCl<sub>2</sub>(PPh<sub>3</sub>)<sub>2</sub> and 0.05 eq. (0.67 mmol, 128 mg) CuI were dissolved in 10 ml NEt<sub>3</sub> and 30 ml THF, then 1.5 eq. (20.1 mmol, 1.98 g, 2.78 ml) ethynyltrimethylsilane was added. The solution was stirred 5 h at room temperature. The mixture was quenched with H<sub>2</sub>O, extracted with DCM and dried over Na<sub>2</sub>SO<sub>4</sub>, the solvent was distilled off in *vacuo* and the residue was purified by column chromatography with heptane ( $R_f = 0.45$ ) to give a pale-yellow oil. The oil was dissolved in 45 ml MeOH and 1 eq. (13.5 mmol, 1.87 g) K<sub>2</sub>CO<sub>3</sub> was added. The solution was stirred 8 h at room temperature. The mixture was quenched with H<sub>2</sub>O, extracted with DCM and dried over Na<sub>2</sub>SO<sub>4</sub>, the solvent was distilled off in *vacuo* and the residue was purified by column chromatography with heptane ( $R_f = 0.43$ ) to give **S7** as a brown solid in 66% (1.66 g, 8.9 mmol) yield. The spectral data are in accordance with the literature<sup>9</sup>:

**<sup>1</sup>H NMR** (250 MHz, CDCl<sub>3</sub>)  $\delta = 7.89 - 7.81$  (m, 2H), 7.75 (ddd,  $J = 8.2$  Hz,  $J = 1.4$  Hz,  $J = 0.5$  Hz, 1H), 7.59 (dd,  $J = 7.5$  Hz,  $J = 1.3$  Hz, 1H), 7.46 – 7.32 (m, 2H), 3.53 (s, 1H). **<sup>13</sup>C NMR** (63 MHz, CDCl<sub>3</sub>)  $\delta = 136.9$  (CH), 135.5, 131.7 (C), 130.2 (CH), 130.1 (C), 129.6, 128.3, 126.1, 125.6 (CH), 118.5 (C), 84.6, 84.2 (C≡C).

### 2,6-dibromo-4'-(*tert*-butyl)-1,1'-biphenyl (**S3a**)

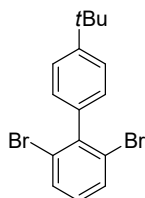

In a pressure tube, 500 mg (1.382 mmol) of **S2a**, 0.05 eq. (0.069 mmol, 51 mg) Pd(dppf)Cl<sub>2</sub>, 2 eq. (2.764 mmol, 594 mg) K<sub>3</sub>PO<sub>4</sub> and 1.5 eq. (2.073 mmol, 374 mg) (4-(*tert*-butyl)phenyl)boronic acid were dissolved in 6 mL of DMSO under argon counter current. The pressure tube was sealed with a Teflon cap and the solution was stirred for 24 h at 100 °C in a heating block. The reaction mixture was cooled to room temperature and quenched with H<sub>2</sub>O, extracted with DCM and dried over Na<sub>2</sub>SO<sub>4</sub>, the solvent was distilled off in *vacuo* and the residue was purified by column chromatography with heptane ( $R_f = 0.66$ ) to give **S3a** as a colorless oil in 39% (200.1 mg, 0.544 mmol) yield. The spectral data are in accordance with the literature.<sup>10</sup>

**<sup>1</sup>H NMR** (500 MHz, CDCl<sub>3</sub>)  $\delta = 7.64$  (d,  $^3J = 8.0$  Hz, 2H), 7.51 – 7.47 (m, 2H), 7.19 – 7.16 (m, 2H), 7.05 (t,  $^3J = 8.0$  Hz, 1H), 1.41 (s, 9H). **<sup>13</sup>C NMR** (126 MHz, CDCl<sub>3</sub>)  $\delta = 150.8$ , 143.1, 138.1 (C), 131.8, 129.6, 128.7, 125.0 (CH), 124.8, 34.6 (C), 31.4 (CH<sub>3</sub>).

#### 4-chloro-3,5-bis((8-chloronaphthalen-1-yl)ethynyl)pyridine (**S3b**)

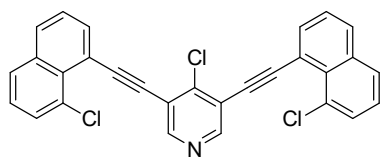

According to a modified literature procedure unknown **S3b** was synthesized.<sup>1</sup> In a pressure tube, 200 mg (0.74 mmol) of **S2b**, 0.05 eq. (0.037 mmol, 43 mg) Pd(PPh<sub>3</sub>)<sub>4</sub>, 0.05 eq. (0.037 mmol, 7 mg) Cul and 2.2 eq. (1.62 mmol, 303 mg) **S7**

were dissolved in 2 mL of HN<sup>i</sup>Pr<sub>2</sub> and 4 mL of MeCN under argon counter current. The pressure tube was sealed with a Teflon cap and the solution was stirred for 24 h at 50 °C in a heating block. The reaction mixture was cooled to room temperature and quenched with H<sub>2</sub>O, the precipitate was filtered off and washed several times with water, heptane, ethyl acetate and a little DCM. After drying *in vacuo*, **S3b** was isolated as a colorless solid in a yield of 61% (217.8 mg, 0.45 mmol).

**mp.** 186-189 °C. **<sup>1</sup>H NMR** (250 MHz, DMSO, 100 °C) δ = 8.79 (s, 2H), 8.16 – 7.96 (m, 6H), 7.80 – 7.51 (m, 6H). **<sup>13</sup>C NMR** (63 MHz, DMSO, 100 °C) δ = 150.7, 136.1 (CH), 134.9 (C), 130.7 (CH), 129.8 (C), 129.4, 128.3, 126.3, 125.6 (CH), 120.2, 116.8 (C), 98.0, 88.9 (C≡C). **IR** (ATR, cm<sup>-1</sup>):  $\tilde{\nu}$  = 1418 (m), 1401 (m), 1197 (m), 816 (vs), 785 (m), 752 (vs), 729 (m), 622 (m), 548 (m). **MS** (EI, 70 eV): m/z (%) = 481 (36, M<sup>+</sup>), 348 (52), 242 (91), 241 (93), 240 (51), 192 (62), 188 (58), 187 (91), 174 (100), 173 (96), 182 (58). **HRMS** (ESI-TOF): calculated for C<sub>29</sub>H<sub>15</sub>Cl<sub>3</sub>N ([M+H]<sup>+</sup>) 482.0270, found 482.0280.

#### 8,8'-((4'-(*tert*-butyl)-[1,1'-biphenyl]-2,6-diyl)bis(ethyne-2,1-diyl))bis(1-chloronaphthalene) (**1a**)

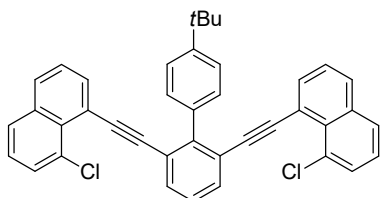

In a pressure tube, 100 mg (0.272 mmol) of **S3a**, 0.05 eq. (0.014 mmol, 3 mg) Pd(OAc)<sub>2</sub>, 0.05 eq. (0.014 mmol, 3 mg) Cul, 0.1 eq. (0.027 mmol, 13 mg) XPhos and 3 eq. (0.816 mmol, 152 mg) **S7** were dissolved in 1 mL of HN<sup>i</sup>Pr<sub>2</sub>

and 2 mL of toluene under an argon counter current. The pressure tube was sealed with a Teflon cap and the solution was stirred for 24 h at 100 °C in a heating block. The reaction mixture was cooled to room temperature and quenched with H<sub>2</sub>O, extracted with DCM and dried over Na<sub>2</sub>SO<sub>4</sub>. The solvent was distilled off *in vacuo* and the residue was purified by column chromatography with heptane/ethyl acetate (20:1, R<sub>f</sub> = 0.33) to give **1a** as a colorless solid in 44% (68.9 mg, 0.119 mmol) yield.

**mp.** 129-131 °C. **<sup>1</sup>H NMR** (300 MHz, CDCl<sub>3</sub>) δ = 7.73 – 7.69 (m, 3H), 7.68 – 7.64 (m, 3H), 7.62 – 7.58 (m, 2H), 7.55 – 7.49 (m, 4H), 7.38 – 7.27 (m, 6H), 7.24 (d, J = 2.2 Hz, 1H), 1.44 (s, 9H). **<sup>13</sup>C NMR** (75 MHz, CDCl<sub>3</sub>) δ = 150.3, 146.1, 136.7 (C), 135.7 (CH), 135.5, 131.9 (C), 131.4, 130.3 (CH), 129.5 (C), 129.3, 129.3, 128.1, 127.0, 125.9, 125.5, 124.5 (CH), 124.1, 119.9 (C), 95.8, 93.9 (C≡C), 34.7 (C), 31.5 (CH<sub>3</sub>). **IR** (ATR, cm<sup>-1</sup>):  $\tilde{\nu}$  = 1362 (m), 1197 (m), 832 (m), 816 (s), 804 (m), 752 (vs), 732 (m), 604 (m), 587 (m). **MS** (EI, 70 eV): m/z (%) = 578

(35, M<sup>+</sup>), 523 (66), 522 (66), 486 (68), 452 (68), 451 (71), 450 (73), 225 (100), 224 (79).

**HRMS** (EI): calculated for C<sub>40</sub>H<sub>28</sub>Cl<sub>2</sub> ([M]<sup>+</sup>) 578.15626, found 578.15545; calculated for C<sub>40</sub>H<sub>28</sub>Cl<sub>1</sub><sup>37</sup>Cl<sub>1</sub> ([M]<sup>+</sup>) 580.15331, found 580.15411.

#### 4-(4-(*tert*-butyl)phenyl)-3,5-bis((8-chloronaphthalen-1-yl)ethynyl)pyridine (**1b**)

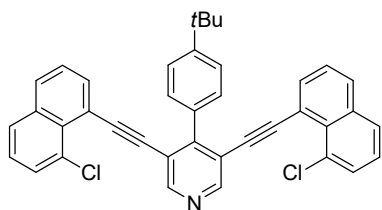

In a pressure tube, 100 mg (0.207 mmol) of **S3b**, 0.05 eq. (0.01 mmol, 12 mg) Pd(PPh<sub>3</sub>)<sub>4</sub>, 2 eq. (0.414 mmol, 88 mg) K<sub>3</sub>PO<sub>4</sub> and 1.2 eq. (0.248 mmol, 44 mg) 4-(*tert*-butyl)phenyl)boronic acid were dissolved in 3 mL of 1,4-dioxane and 1 mL of H<sub>2</sub>O under an argon counter current.

The pressure tube was sealed with a Teflon cap and the solution was stirred for 24 h at 90 °C in a heating block. The reaction mixture was cooled to room temperature and quenched with H<sub>2</sub>O, extracted with DCM and dried over Na<sub>2</sub>SO<sub>4</sub>. The solvent was distilled off in *vacuo* and the residue was purified by column chromatography with heptane/ethyl acetate (4:1, *R<sub>f</sub>* = 0.27) to give **1b** as a colorless solid in 76% (91.5 mg, 0.158 mmol) yield.

**mp.** 192-195 °C. **<sup>1</sup>H NMR** (500 MHz, CDCl<sub>3</sub>) δ = 8.87 (s, 2H), 7.78 (dd, *J* = 8.1 Hz, *J* = 1.4 Hz, 2H), 7.74 – 7.66 (m, 4H), 7.59 – 7.52 (m, 4H), 7.46 (dd, *J* = 7.3 Hz, *J* = 1.3 Hz, 2H), 7.35 (td, *J* = 7.8 Hz, *J* = 2.2 Hz, 4H), 1.44 (s, 9H). **<sup>13</sup>C NMR** (126 MHz, CDCl<sub>3</sub>) δ = 151.7 (C), 136.0 (CH), 135.4, 133.8, 131.8 (C), 130.0, 129.6 (CH), 129.5 (C), 129.5, 128.2, 126.1, 125.5, 124.8 (CH), 119.1 (C), 96.5, 92.5 (C≡C), 34.8 (C), 31.4 (CH<sub>3</sub>). **IR** (ATR, cm<sup>-1</sup>):  $\tilde{\nu}$  = 1397 (m), 1362 (m), 1197 (m), 835 (m), 814 (s), 752 (vs), 699 (m), 581 (m), 546 (m). **MS** (EI, 70 eV): *m/z* (%) = 579 (17, M<sup>+</sup>), 527 (14), 526 (24), 525 (69), 524 (43), 523 (100), 589 (12), 488 (25), 452 (27), 451 (26). **HRMS** (ESI-TOF): calculated for C<sub>39</sub>H<sub>28</sub>Cl<sub>2</sub>N ([M+H]<sup>+</sup>) 580.1599, found 580.1606.

#### 2-(*tert*-butyl)-4,10-bis(8-chloronaphthalen-1-yl)pyrene (**2a**)

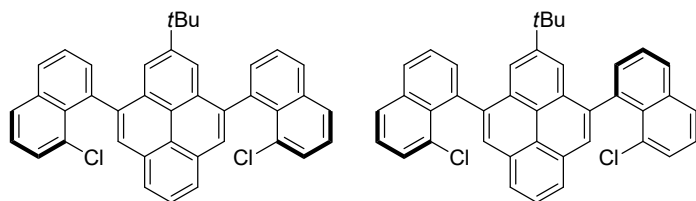

According to modified literature-known procedure unknown **2a** was synthesized.<sup>11</sup> In a pressure tube, 100 mg (0.173 mmol) of **1a** and 1 eq. PtCl<sub>2</sub> (0.173 mmol, 45 mg) were

dissolved in 3 mL of toluene under an argon counter current. The pressure tube was sealed with a Teflon cap and the solution was stirred for 20 h at 110 °C in a heating block. The reaction mixture was cooled to room temperature, quenched with H<sub>2</sub>O, extracted with DCM and dried over Na<sub>2</sub>SO<sub>4</sub>. The solvent was distilled off in *vacuo* and the residue was purified by column chromatography with heptane/ethyl acetate (20:1, *R<sub>f</sub>* = 0.40) to give **2a** as a yellow solid, as mixture of two atropisomers, in 38% (38.0 mg, 0.066 mmol) yield.

**mp.** 125-128 °C. **<sup>1</sup>H NMR** (500 MHz, CDCl<sub>3</sub>) δ = 8.18, 8.17 (2 s, 4H), 8.06 – 8.00 (m, 10H), 7.96 – 7.93 (m, 4H), 7.78 – 7.74 (m, 2H), 7.71 – 7.64 (m, 6H), 7.61 – 7.58 (m, 4H), 7.47 – 7.39 (m, 8H), 0.99, 0.98 (2 s, 18H). **<sup>13</sup>C NMR** (126 MHz, CDCl<sub>3</sub>) δ = 148.4, 148.2, 141.1,

141.1, 137.7, 137.7, 135.9, 132.5, 132.4 (C), 131.9 (CH), 131.7 (C), 131.7 (CH), 130.6, 130.6, 130.2 (C), 129.2, 129.2, 129.1, 128.2, 128.2, 127.2, 127.2, 125.9, 125.8, 125.8, 125.7, 125.6, 124.6 (CH), 124.0, 124.0, 122.1, 122.0 (C), 121.1, 121.0 (CH), 34.9, 34.9 (C), 31.4, 31.3 (CH<sub>3</sub>). **IR** (ATR, cm<sup>-1</sup>):  $\tilde{\nu}$  = 1195 (m), 905 (m), 888 (m), 822 (s), 812 (m), 779 (m), 762 (vs), 729 (s), 707 (m). **MS** (EI, 70 eV): m/z (%) = 578 (71, M<sup>+</sup>), 489 (50), 488 (56), 487 (66), 486 (57), 452 (67), 451 (68), 450 (65), 238 (53), 237 (77), 231 (77), 225 (100), 44 (58). **HRMS** (EI): calculated for C<sub>40</sub>H<sub>28</sub>Cl<sub>2</sub> ([M]<sup>+</sup>) 578.15626, found 578.15566; calculated for C<sub>40</sub>H<sub>28</sub>Cl<sub>1</sub><sup>37</sup>Cl<sub>1</sub> ([M]<sup>+</sup>) 580.15331, found 580.15497.

#### 7-(*tert*-butyl)-5,9-bis(8-chloronaphthalen-1-yl)naphtho[2,1,8-*def*]isoquinoline (**2b**)

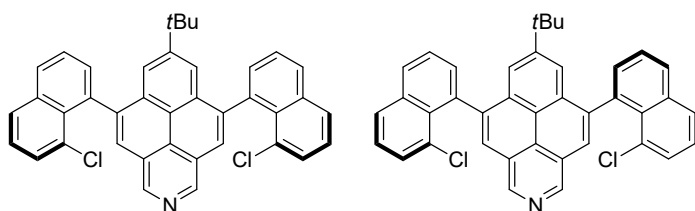

According to literature-known procedure unknown **2b** was synthesized.<sup>1</sup> In a pressure tube, 100 mg (0.172 mmol) of **1b** were dissolved in 60 eq. (10.32 mmol,

993 mg, 670  $\mu$ l) MsOH. The pressure tube was sealed with a Teflon cap and the solution was stirred for 5 h at 120 °C in a heating block. The reaction mixture was cooled to room temperature, neutralized with sat. NaHCO<sub>3</sub>-solution and extracted with DCM. The combined organic phases were dried over Na<sub>2</sub>SO<sub>4</sub>. The solvent was distilled off *in vacuo* and the residue was purified by column chromatography with heptane/ethyl acetate (1:1, R<sub>f</sub> = 0.45) to give **2b** as a yellow solid, as mixture of two atropisomers, in a yield of 68% (67.8 mg, 0,117 mmol).

**mp.** 132-135 °C. **<sup>1</sup>H NMR** (500 MHz, CDCl<sub>3</sub>)  $\delta$  = 9.43 (s, 4H), 8.09 – 8.05 (m, 8H), 7.97 – 7.94 (m, 4H), 7.76 – 7.74 (m, 2H), 7.70 – 7.66 (m, 8H), 7.65 (s, 2H), 7.48 – 7.41 (m, 8H), 0.99, 0.98 (2 s, 18H). **<sup>13</sup>C NMR** (126 MHz, CDCl<sub>3</sub>)  $\delta$  = 151.1, 151.0 (C), 143.9 (CH), 142.9, 142.9, 136.8, 136.7, 135.9, 135.9, 133.5, 133.4 (C), 131.9, 131.6 (CH), 131.4, 131.3, 130.0 (C), 129.6, 129.6, 129.3, 129.2, 128.4, 128.3 (CH), 127.0, 126.9 (C), 125.9, 125.8 (CH), 124.9 (C), 124.6, 124.5, 121.8, 121.7 (CH), 120.5, 120.5 (C), 35.2, 35.2 (C), 31.3, 31.2(CH<sub>3</sub>). **IR** (ATR, cm<sup>-1</sup>):  $\tilde{\nu}$  = 1362 (m), 1197 (m), 903 (m), 820 (s), 812 (s), 779 (m), 762 (vs), 740 (s), 682 (m). **MS** (EI, 70 eV): m/z (%) = 579 (100, M<sup>+</sup>), 490 (14), 489 (14), 488 (48), 452 (20), 451 (22), 239 (16), 238 (18), 233 (11), 232 (19), 226 (13). **HRMS** (ESI-TOF): calculated for C<sub>39</sub>H<sub>28</sub>Cl<sub>2</sub>N ([M+H]<sup>+</sup>) 580.1599, found 580.1597.

#### 8-(*tert*-butyl)diacenaphtho[1,2-*e*:1',2'-*l*]pyrene (**1a**)

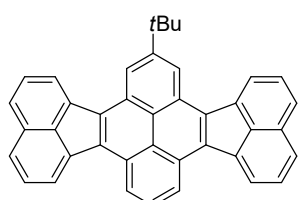

In a pressure tube, 50 mg (0.086 mmol) of **1a**, 0.4 eq. (0.035 mmol, 6 mg) PdCl<sub>2</sub>, 0.8 eq. (0.069 mmol, 19 mg) PCy<sub>3</sub> and 6 eq. (0.516 mmol, 8 mg, 77  $\mu$ l) DBU were dissolved in 3 mL of NMP

under an argon counter current. The pressure tube was sealed with a Teflon cap and the solution was stirred for 18 h at 150 °C in a heating block. The reaction mixture was cooled to room temperature, quenched with H<sub>2</sub>O and extracted with DCM. The combined organic phases were dried over Na<sub>2</sub>SO<sub>4</sub>. The solvent was distilled off *in vacuo* and the residue was purified by column chromatography with heptane/ethyl acetate (5:1, *R<sub>f</sub>* = 0.48) to give **3a** as a red solid in a yield of 51% (22.3 mg, 0.044 mmol).

**mp.** 343-346 °C. **<sup>1</sup>H NMR** (500 MHz, CDCl<sub>3</sub>) δ = 9.18 (s, 2H), 8.98 (d, *J* = 7.8 Hz, 2H), 8.59 (d, *J* = 7.0 Hz, 2H), 8.55 (d, *J* = 7.0 Hz, 2H), 8.07 (t, *J* = 7.8 Hz, 1H), 7.87 (d, *J* = 8.0 Hz, 2H), 7.85 (d, *J* = 8.0 Hz, 2H), 7.74 (dd, *J* = 8.1 Hz, *J* = 6.9 Hz, 2H), 7.68 (dd, *J* = 8.1 Hz, *J* = 6.9 Hz, 2H), 1.82 (s, 9H). **<sup>13</sup>C NMR** (126 MHz, CDCl<sub>3</sub>) δ = 149.2, 138.1, 138.0, 134.5, 134.3, 132.2, 129.3, 129.1 (C), 127.9, 127.9, 127.6, 127.5, 126.1 (CH), 125.0 (C), 124.9, 124.9 (CH), 123.4 (C), 121.9, 119.4 (CH), 35.7 (C), 32.2 (CH<sub>3</sub>). **IR** (ATR, cm<sup>-1</sup>): ν̃ = 1451 (m), 1420 (m), 830 (m), 814 (m), 756 (vs), 721 (m), 705 (m), 699 (m), 641 (m). **MS** (EI, 70 eV): *m/z* (%) = 509 (60, M<sup>+</sup>), 491 (57), 461 (42), 451 (52), 450 (57), 448 (42), 253 (53), 237 (46), 232 (51), 231 (100), 230 (57). **HRMS** (EI): calculated for C<sub>40</sub>H<sub>26</sub> ([M]<sup>+</sup>) 506.20290, found 506.20281.

#### 17-(*tert*-butyl)acenaphtho[1',2':3,4]naphtho[2,1,8-*def*]acenaphtho[1,2-*h*]isoquinoline (**3b**)

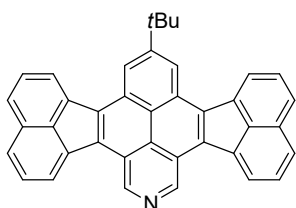

In a pressure tube, 100 mg (0.172 mmol) of **1b**, 0.4 eq. (0.069, 12 mg) PdCl<sub>2</sub>, 0.8 eq. (0.138 mmol, 39 mg) PCy<sub>3</sub> and 6 eq. (1.032 mmol, 157 mg, 154 μl) DBU were dissolved in 3 mL of NMP under an argon counter current. The pressure tube was sealed with a Teflon cap and the solution was stirred for 18 h at 150 °C in a heating block. The reaction mixture was cooled to room temperature and quenched with H<sub>2</sub>O, the precipitate was filtered off and washed several times with water, heptane and ethyl acetate. The residue was solved in DCM and the solvent was distilled off *in vacuo* to give **3b** as a red solid in a yield of 56% (49 mg, 0.097 mmol). Due to the poor solubility it was not possible to record a <sup>13</sup>C-NMR spectrum.

**mp.** > 350 °C. **<sup>1</sup>H NMR** (500 MHz, CS<sub>2</sub>/CDCl<sub>3</sub>) δ = 10.27 (s, 2H), 9.23 (s, 2H), 8.68 – 8.62 (m, 4H), 7.95 – 7.91 (m, 4H), 7.80 – 7.76 (m, 4H), 1.87 (s, 9H). **IR** (ATR, cm<sup>-1</sup>): ν̃ = 1420 (m), 1154 (m), 853 (m), 816 (m), 760 (vs), 721 (m), 645 (m), 620 (m), 556 (m). **MS** (EI, 70 eV): *m/z* (%) = 507 (100, M<sup>+</sup>), 233 (65), 232 (41), 169 (29), 113 (28), 83 (34), 71 (32), 69 (74), 57 (49), 55 (49), 43 (62), 41 (53). **HRMS** (ESI-TOF): calculated for C<sub>39</sub>H<sub>26</sub>N ([M+H]<sup>+</sup>) 508.2065, found 508.2062.

## X-Ray data

Table S5: X-Ray data of 8-(tert-butyl)diacenaphtho[1,2-e:1',2'-l]pyrene (3a)

---

|                                      |                                 |
|--------------------------------------|---------------------------------|
| Chem. Formula                        | C <sub>40</sub> H <sub>26</sub> |
| Form. Wght [g mol <sup>-1</sup> ]    | 506.61                          |
| colour                               | red                             |
| Cryst. system                        | monoclinic                      |
| Space group (Hall group)             | P 21/n (--P 2yn)                |
| <i>a</i> [Å]                         | 5.1374(2)                       |
| <i>b</i> [Å]                         | 19.8255(7)                      |
| <i>c</i> [Å]                         | 12.6832(4)                      |
| α [°]                                | 90                              |
| β [°]                                | 92.011(1)                       |
| γ [°]                                | 90                              |
| <i>V</i> [Å <sup>3</sup> ]           | 1291.01(8)                      |
| <i>Z</i>                             | 2                               |
| <i>N</i> <sub>ref</sub>              | 2819                            |
| θ <sub>max</sub> [°]                 | 27.000                          |
| <i>h, k, l</i> <sub>max</sub>        | 6,25,16                         |
| ρ <sub>x</sub> [g cm <sup>-3</sup> ] | 1.303                           |
| μ [mm <sup>-1</sup> ]                | 0.074                           |
| λ <sub>MoKα</sub> [Å]                | 0.71073                         |
| <i>T</i> [K]                         | 123                             |
| <i>F</i> (000)                       | 532.0                           |
| <i>N</i> <sub>par</sub>              | 219                             |
| <i>R</i>                             | 0.0493(2221)                    |
| <i>wR</i> <sub>2</sub>               | 0.1370(2819)                    |
| <i>S</i>                             | 1.042                           |

---



# Measurements

## Absorption and Emission spectra

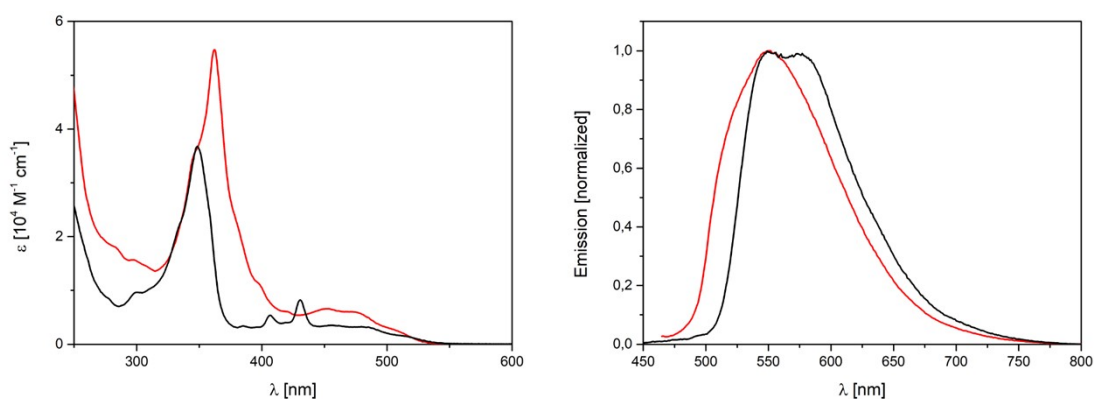

Figure S1: Absorption (left) and Emission (right,  $\lambda_{\text{ex}} = 430 \text{ nm}$  (**3a**),  $\lambda_{\text{ex}} = 450 \text{ nm}$  (**3b**)) spectra of **3a** (black) and **3b** (red) in DCM ( $c = 10^{-5} \text{ M}$ ) at  $20 \text{ }^\circ\text{C}$ .

Table S6: Spectroscopic Data (absorption) of **3a** and **3b**, DCM ( $c = 10^{-5} \text{ M}$ ) at  $20 \text{ }^\circ\text{C}$ .

|           | $\lambda_{1,a}$<br>bs<br>[nm<br>] | $\epsilon_1^a$ | $\lambda_{2,a}$<br>bs<br>[nm<br>] | $\epsilon_2^a$ | $\lambda_{3,a}$<br>bs<br>[nm<br>] | $\epsilon_3^a$ | $\lambda_{4,a}$<br>bs<br>[nm<br>] | $\epsilon_4^a$ | $\lambda_{5,a}$<br>bs<br>[nm<br>] | $\epsilon_5^a$ | $\lambda_{6,a}$<br>bs<br>[nm<br>] | $\epsilon_6^a$ | $\lambda_{7,\text{abs}}$<br>[nm] | $\epsilon_7^a$ |
|-----------|-----------------------------------|----------------|-----------------------------------|----------------|-----------------------------------|----------------|-----------------------------------|----------------|-----------------------------------|----------------|-----------------------------------|----------------|----------------------------------|----------------|
| <b>3a</b> | 512<br>b                          | 0.1<br>6       | 486<br>b                          | 0.3<br>1       | 455                               | 0.3<br>5       | 431                               | 0.8<br>2       | 407                               | 0.5<br>4       | 385                               | 0.34           | 348                              | 3.68           |
| <b>3b</b> | 505<br>b                          | 0.2<br>3       | 475<br>b                          | 0.6<br>0       | 452                               | 0.6<br>6       | 397<br>b                          | 1.2            | 362                               | 5.4<br>7       |                                   |                |                                  |                |

<sup>a</sup> [ $10^4 \text{ M}^{-1} \text{ cm}^{-1}$ ]; <sup>b</sup> indicated as shoulder

Table S7: Spectroscopic Data (emission) of **3a** and **3b**, DCM ( $c = 10^{-5} \text{ M}$ ) at  $20 \text{ }^\circ\text{C}$ .

|           | $\lambda_{1,\text{emi}}$<br>[nm] | $\lambda_{2,\text{emi}}$<br>[nm] | $\Phi$<br>[%]  |
|-----------|----------------------------------|----------------------------------|----------------|
| <b>3a</b> | 550                              | 577                              | 2 <sup>a</sup> |
| <b>3b</b> | 550                              |                                  | 3 <sup>a</sup> |

<sup>a</sup> Fluorescence standard: coumarine 153 in EtOH ( $\phi = 0.38^{12}$ ,  $\lambda_{\text{exc}} = 430 \text{ nm}$  (**3a**);  $\lambda_{\text{exc}} = 450 \text{ nm}$  (**3b**))

## Cyclic and differential pulse voltammetry

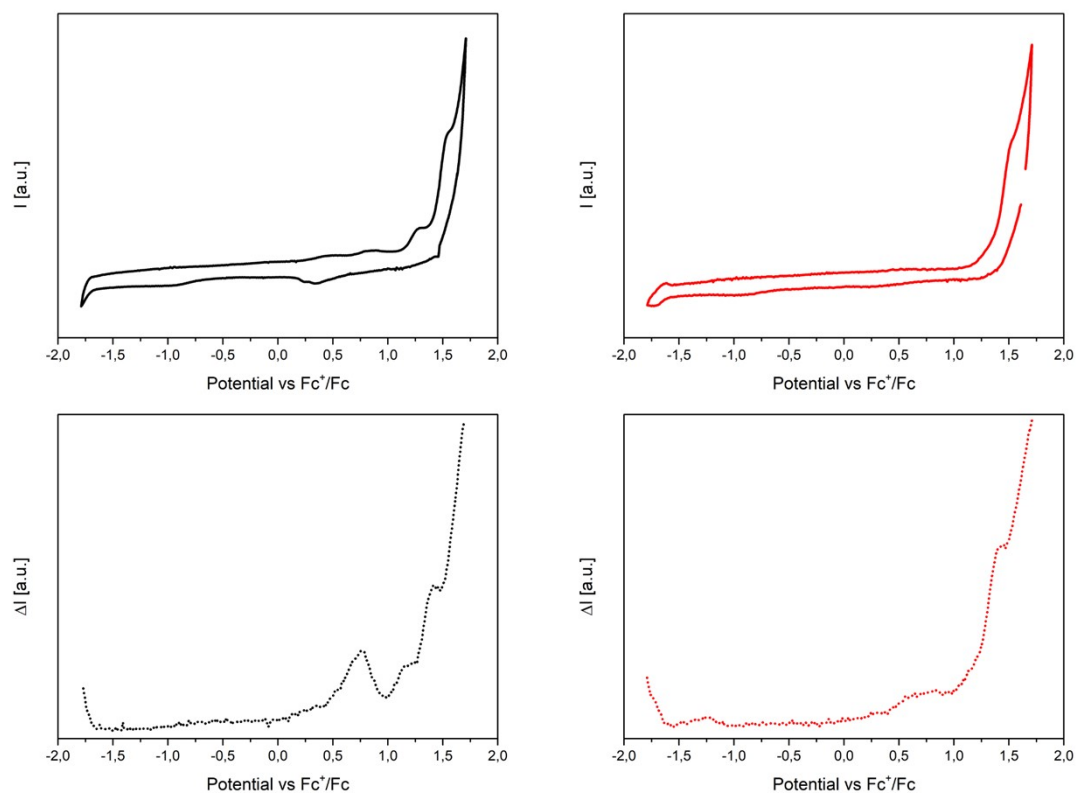

Figure S2: Cyclic voltammograms (top) of **3a** (left, black) and **3b** (right, red) and differential pulse voltammograms (bottom) of **3a** (left, black) and **3b** (right, red). Measured in concentration of  $1 \cdot 10^{-4}$  in DCM with 0.25 M  $n\text{-Bu}_4\text{NPF}_6$  as a supporting electrolyte, glassy carbon working electrode, and Pt counter-electrode with ferrocene as standard at a scan rate of 100 mV/s.

Table S8: data of cyclic and differential pulse voltammetry and DFT calculations

|           | Ox <sub>1</sub><br>[V] <sup>a</sup> | Ox <sub>1,o</sub><br>n<br>[V] <sup>a</sup> | Ox <sub>2</sub><br>[V] <sup>a</sup> | Ox <sub>2,o</sub><br>n<br>[V] <sup>a</sup> | Ox <sub>3</sub><br>[V] <sup>a</sup> | Ox <sub>1,on</sub><br>[V] <sup>a</sup> | E <sub>HOMO</sub><br>[eV] | E <sub>HOMO/D</sub><br>FT<br>[eV] | E <sub>HOMO/D</sub><br>FT<br>[eV] | E <sub>gap/DFT</sub><br>[eV] |
|-----------|-------------------------------------|--------------------------------------------|-------------------------------------|--------------------------------------------|-------------------------------------|----------------------------------------|---------------------------|-----------------------------------|-----------------------------------|------------------------------|
| <b>3a</b> | 0.85                                | 0.75                                       | 1.29                                | 1.18                                       | 1.54                                | 1.43                                   | -5.55 <sup>a</sup>        | -5.17                             | -2.39                             | 2.78                         |
| <b>3b</b> | 0.94<br>b                           | 0.84                                       | 1.54                                | 1.43                                       |                                     |                                        | -5.64 <sup>a</sup>        | -5.31                             | -2.50                             | 2.81                         |

<sup>a</sup> V vs. Fc<sup>+</sup>/Fc <sup>b</sup> estimated with DPV <sup>c</sup> determined the HOMO level of ferrocene is considered to be 4.80 eV below the vacuum level: E<sub>HOMO</sub> = -e[(E<sub>Ox,on</sub> vs Fc<sup>+</sup>/Fc)+4.8]

## DFT Calculations

Density functional theory (DFT) and time-dependent density functional theory (TD-DFT) calculations were performed with Gaussian09.<sup>13</sup> The ground and excited state structures were optimized using the B3LYP, functional and the 6-31G(d,p) basis set. The solvent effects have been considered by using the integral equation formalism variant (IEFPCM) model. NICS2BC were calculated with the B3LYP functional coupled with Grimme's D3empirical dispersion correction and 6-311G(d,p) basis set. Nucleus independent chemical shifts (NICS) were calculated using the gauge including atomic orbitals (GIAO) method at the same level of theory. The bond current maps were generated using the BC-Wizard.<sup>14</sup>

Cartesian coordinates of the optimized ground-states ( $S_0$ ) and excited states ( $S_1$ )

Table S9:  $S_0$ : 8-(tert-butyl)diacenaphtho[1,2-e:1',2'-l]pyrene (**3a**)

E = -1540.0609 Hartree

| Symbol | X         | Y         | Z         |
|--------|-----------|-----------|-----------|
| C      | 0.022035  | -4.217914 | -0.019989 |
| C      | -1.187840 | -3.533087 | -0.012587 |
| C      | -1.226723 | -2.128839 | -0.001527 |
| C      | 0.012757  | -1.400306 | -0.003887 |
| C      | 1.256785  | -2.120641 | -0.000498 |
| C      | 1.226782  | -3.526189 | -0.011415 |
| C      | -2.458229 | -1.383729 | 0.001681  |
| C      | 0.008451  | 0.030980  | -0.007049 |
| C      | -1.228822 | 0.759546  | -0.008858 |
| C      | -2.460330 | 0.013086  | -0.018591 |
| C      | -1.193685 | 2.160954  | 0.010377  |
| H      | -2.127408 | 2.702105  | 0.026338  |
| C      | 0.001544  | 2.888867  | 0.026309  |
| C      | 1.198096  | 2.172525  | 0.013156  |
| C      | 1.238654  | 0.766552  | -0.007398 |
| C      | 2.474432  | 0.029793  | -0.017061 |
| C      | 2.482372  | -1.367975 | 0.003164  |
| H      | 0.025183  | -5.303624 | -0.034149 |
| H      | -2.106728 | -4.100483 | -0.026774 |
| H      | 2.149389  | -4.087534 | -0.024637 |
| H      | 2.129868  | 2.712731  | 0.032824  |
| C      | 3.877998  | 0.509292  | -0.040036 |

---

|   |           |           |           |
|---|-----------|-----------|-----------|
| C | -3.866752 | 0.483151  | -0.040912 |
| C | -4.667424 | -0.689126 | -0.013238 |
| C | 4.686524  | -0.657604 | -0.012142 |
| C | -4.526633 | 1.700933  | -0.089927 |
| H | -4.007733 | 2.650436  | -0.128549 |
| C | -5.948927 | 1.728970  | -0.098910 |
| H | -6.442764 | 2.695279  | -0.136881 |
| C | -6.712707 | 0.578115  | -0.061062 |
| H | -7.797380 | 0.637798  | -0.067473 |
| C | -6.070964 | -0.691749 | -0.016803 |
| C | -5.940469 | -3.112176 | 0.064384  |
| H | -6.430944 | -4.080323 | 0.099028  |
| C | -4.518211 | -3.078929 | 0.061961  |
| H | -3.995541 | -4.026331 | 0.101046  |
| C | -3.863102 | -1.858573 | 0.017625  |
| C | 6.090159  | -0.650773 | -0.016552 |
| C | 6.723243  | 0.623346  | -0.061884 |
| H | 7.807487  | 0.690332  | -0.068877 |
| C | 5.951689  | 1.768960  | -0.100333 |
| H | 6.438978  | 2.738551  | -0.139441 |
| C | 4.529601  | 1.731481  | -0.090707 |
| H | 4.004696  | 2.677579  | -0.130625 |
| C | 4.553899  | -3.048563 | 0.062863  |
| H | 4.037674  | -3.999510 | 0.101846  |
| C | 3.890396  | -1.832699 | 0.018966  |
| C | -6.708214 | -1.964066 | 0.023883  |
| H | -7.792680 | -2.027668 | 0.025070  |
| C | 5.976300  | -3.072033 | 0.064808  |
| H | 6.473466  | -4.036776 | 0.099189  |
| C | 6.736124  | -1.918656 | 0.023994  |
| H | 7.821011  | -1.974770 | 0.024653  |
| C | -0.044728 | 4.428775  | 0.061434  |
| C | -0.797988 | 4.949325  | -1.185885 |
| H | -0.289061 | 4.644424  | -2.106178 |
| H | -1.824479 | 4.573723  | -1.230473 |
| H | -0.844684 | 6.043754  | -1.170142 |
| C | 1.360696  | 5.059616  | 0.069163  |

---

|   |           |          |           |
|---|-----------|----------|-----------|
| H | 1.939671  | 4.757433 | 0.948096  |
| H | 1.931717  | 4.795922 | -0.827299 |
| H | 1.270965  | 6.150096 | 0.093154  |
| C | -0.786256 | 4.890502 | 1.338738  |
| H | -0.834021 | 5.984426 | 1.374026  |
| H | -1.811844 | 4.511560 | 1.375816  |
| H | -0.268042 | 4.544003 | 2.238889  |

Table S10:  $S_0$ : 17-(tert-butyl)acenaphtho[1',2':3,4]naphtho[2,1,8-def]acenaphtho[1,2-h]isoquinoline (**3b**)

E = -1556.0979 Hartree

| Symbol | X         | Y         | Z         |
|--------|-----------|-----------|-----------|
| C      | -1.125946 | -3.512485 | 0.101016  |
| C      | -1.213611 | -2.111607 | 0.053336  |
| C      | 0.012688  | -1.375569 | 0.037604  |
| C      | 1.243621  | -2.103333 | 0.054269  |
| C      | 1.164755  | -3.505913 | 0.101120  |
| C      | -2.452394 | -1.382901 | 0.022256  |
| C      | 0.008349  | 0.051217  | 0.017969  |
| C      | -1.232167 | 0.771158  | 0.015094  |
| C      | -2.460341 | 0.015279  | 0.000726  |
| C      | -1.196549 | 2.172133  | 0.031108  |
| H      | -2.129170 | 2.715478  | 0.045160  |
| C      | 0.001550  | 2.897637  | 0.044307  |
| C      | 1.200840  | 2.183751  | 0.031938  |
| C      | 1.241870  | 0.778150  | 0.014699  |
| C      | 2.474446  | 0.032062  | -0.000204 |
| C      | 2.476642  | -1.367094 | 0.023925  |
| H      | -2.025273 | -4.115980 | 0.126420  |
| H      | 2.068225  | -4.103333 | 0.125365  |
| H      | 2.131467  | 2.726307  | 0.048616  |
| C      | 3.880458  | 0.501334  | -0.040297 |
| C      | -3.869229 | 0.475086  | -0.037260 |
| C      | -4.661646 | -0.702933 | -0.030171 |
| C      | 4.680897  | -0.671246 | -0.029580 |
| C      | -4.536408 | 1.688837  | -0.087080 |
| H      | -4.023104 | 2.642055  | -0.109468 |

---

|   |           |           |           |
|---|-----------|-----------|-----------|
| C | -5.958389 | 1.706186  | -0.118541 |
| H | -6.459021 | 2.668928  | -0.155508 |
| C | -6.714256 | 0.549052  | -0.106472 |
| H | -7.798967 | 0.601585  | -0.132837 |
| C | -6.064514 | -0.716704 | -0.064193 |
| C | -5.914703 | -3.138759 | -0.028538 |
| H | -6.398308 | -4.110843 | -0.028076 |
| C | -4.493331 | -3.094463 | -0.000358 |
| H | -3.958927 | -4.036409 | 0.014168  |
| C | -3.850933 | -1.866936 | 0.002697  |
| C | 6.083942  | -0.675481 | -0.063674 |
| C | 6.724887  | 0.594530  | -0.111031 |
| H | 7.809199  | 0.654406  | -0.137866 |
| C | 5.961052  | 1.746324  | -0.127853 |
| H | 6.455016  | 2.712335  | -0.169204 |
| C | 4.539219  | 1.719436  | -0.095813 |
| H | 4.019671  | 2.669061  | -0.123142 |
| C | 4.529525  | -3.063954 | 0.008598  |
| H | 4.001688  | -4.009539 | 0.027083  |
| C | 3.878500  | -1.840942 | 0.006620  |
| C | -6.690742 | -1.995230 | -0.058862 |
| H | -7.774341 | -2.068063 | -0.081261 |
| C | 5.951114  | -3.098376 | -0.018892 |
| H | 6.441577  | -4.067013 | -0.014457 |
| C | 6.719098  | -1.949515 | -0.053510 |
| H | 7.803201  | -2.014774 | -0.075448 |
| C | -0.044735 | 4.437701  | 0.074666  |
| C | -0.799280 | 4.953238  | -1.174122 |
| H | -0.291122 | 4.645256  | -2.093755 |
| H | -1.826041 | 4.578207  | -1.216582 |
| H | -0.845342 | 6.047606  | -1.161647 |
| C | 1.360423  | 5.069137  | 0.079352  |
| H | 1.940174  | 4.770841  | 0.959088  |
| H | 1.931043  | 4.803303  | -0.816696 |
| H | 1.269415  | 6.159480  | 0.099779  |
| C | -0.785518 | 4.902284  | 1.351459  |
| H | -0.832813 | 5.996207  | 1.383176  |

---

|   |           |           |          |
|---|-----------|-----------|----------|
| H | -1.811217 | 4.523983  | 1.390508 |
| H | -0.266527 | 4.558569  | 2.252179 |
| N | 0.022058  | -4.196316 | 0.126651 |

Table S11:  $S_0$ : diacenaphtho[1,2-e:1',2'-l]pyrene (**3a'**)

E = -1383.1092 Hartree

| Symbol | X         | Y         | Z         |
|--------|-----------|-----------|-----------|
| C      | 0.000041  | -3.525007 | 0.268057  |
| C      | -1.204484 | -2.839526 | 0.216158  |
| C      | -1.238456 | -1.439838 | 0.127936  |
| C      | -0.000002 | -0.715115 | 0.110113  |
| C      | 1.238458  | -1.439810 | 0.127861  |
| C      | 1.204538  | -2.839505 | 0.216170  |
| C      | -2.464286 | -0.696746 | 0.064537  |
| C      | 0.000002  | 0.715113  | 0.110121  |
| C      | -1.238459 | 1.439839  | 0.127873  |
| C      | -2.464279 | 0.696729  | 0.064380  |
| C      | -1.204520 | 2.839512  | 0.216258  |
| H      | -2.125600 | 3.397244  | 0.271673  |
| C      | -0.000015 | 3.525018  | 0.268236  |
| C      | 1.204488  | 2.839526  | 0.216311  |
| C      | 1.238453  | 1.439842  | 0.127976  |
| C      | 2.464289  | 0.696759  | 0.064531  |
| C      | 2.464271  | -0.696720 | 0.064386  |
| H      | 0.000042  | -4.606011 | 0.351826  |
| H      | -2.125542 | -3.397302 | 0.271428  |
| H      | 2.125632  | -3.397215 | 0.271594  |
| H      | 2.125556  | 3.397279  | 0.271702  |
| C      | 3.865749  | 1.168893  | -0.014853 |
| C      | -3.865724 | 1.168878  | -0.015148 |
| C      | -4.666732 | -0.000001 | -0.049956 |
| C      | 4.666716  | -0.000010 | -0.050055 |
| C      | -4.516267 | 2.385845  | -0.089966 |
| H      | -3.988234 | 3.328791  | -0.101166 |
| C      | -5.934427 | 2.417610  | -0.173876 |

|   |           |           |           |
|---|-----------|-----------|-----------|
| H | -6.424193 | 3.383595  | -0.225773 |
| C | -6.698541 | 1.270393  | -0.198422 |
| H | -7.779345 | 1.331322  | -0.266913 |
| C | -6.063026 | 0.000016  | -0.145534 |
| C | -5.934545 | -2.417584 | -0.172785 |
| H | -6.424342 | -3.383581 | -0.224190 |
| C | -4.516375 | -2.385850 | -0.088958 |
| H | -3.988448 | -3.328862 | -0.099667 |
| C | -3.865749 | -1.168891 | -0.014769 |
| C | 6.063011  | -0.000026 | -0.145582 |
| C | 6.698604  | 1.270335  | -0.197914 |
| H | 7.779413  | 1.331222  | -0.266342 |
| C | 5.934545  | 2.417579  | -0.172878 |
| H | 6.424348  | 3.383571  | -0.224296 |
| C | 4.516379  | 2.385850  | -0.089052 |
| H | 3.988435  | 3.328854  | -0.099801 |
| C | 4.516266  | -2.385846 | -0.089836 |
| H | 3.988273  | -3.328820 | -0.100943 |
| C | 3.865702  | -1.168882 | -0.015176 |
| C | -6.698613 | -1.270349 | -0.197856 |
| H | -7.779420 | -1.331260 | -0.266300 |
| C | 5.934431  | -2.417616 | -0.173713 |
| H | 6.424178  | -3.383618 | -0.225491 |
| C | 6.698545  | -1.270400 | -0.198352 |
| H | 7.779351  | -1.331317 | -0.266805 |
| H | -0.000020 | 4.606013  | 0.352115  |

Table S12:  $S_0$ : acenaphtho[1',2':3,4]naphtho[2,1,8-def]acenaphtho[1,2-h]isoquinoline (**3b'**)

E = -1399.1487 Hartree

| Symbol | X         | Y         | Z         |
|--------|-----------|-----------|-----------|
| C      | -1.141412 | -2.822589 | -0.000182 |
| C      | -1.225095 | -1.421663 | -0.000095 |
| C      | 0.000005  | -0.688357 | -0.000257 |
| C      | 1.225099  | -1.421648 | -0.000386 |
| C      | 1.141424  | -2.822590 | -0.000133 |
| C      | -2.459821 | -0.693826 | 0.000033  |



---

|   |           |           |           |
|---|-----------|-----------|-----------|
| C | -0.000002 | 0.737998  | -0.000394 |
| C | -1.242342 | 1.454289  | -0.000632 |
| C | -2.466598 | 0.701232  | -0.000377 |
| C | -1.207106 | 2.856542  | -0.001115 |
| H | -2.125947 | 3.420309  | -0.001282 |
| C | -0.000007 | 3.540762  | -0.001514 |
| C | 1.207100  | 2.856544  | -0.001189 |
| C | 1.242347  | 1.454296  | -0.000428 |
| C | 2.466600  | 0.701240  | 0.000024  |
| C | 2.459822  | -0.693820 | -0.000457 |
| H | -2.040250 | -3.423149 | -0.000361 |
| H | 2.040287  | -3.423120 | 0.000176  |
| H | 2.125928  | 3.420332  | -0.001876 |
| C | 3.874043  | 1.162661  | 0.000743  |
| C | -3.874044 | 1.162657  | -0.000373 |
| C | -4.666716 | -0.012550 | 0.000162  |
| C | 4.666714  | -0.012547 | 0.000120  |
| C | -4.538401 | 2.374613  | -0.000723 |
| H | -4.021237 | 3.323563  | -0.001153 |
| C | -5.959088 | 2.394314  | -0.000519 |
| H | -6.459070 | 3.356377  | -0.000811 |
| C | -6.713958 | 1.240494  | 0.000054  |
| H | -7.797333 | 1.292824  | 0.000221  |
| C | -6.066116 | -0.024514 | 0.000441  |
| C | -5.919082 | -2.442516 | 0.001554  |
| H | -6.403421 | -3.412464 | 0.002139  |
| C | -4.499102 | -2.399471 | 0.001267  |
| H | -3.962055 | -3.337451 | 0.001735  |
| C | -3.857783 | -1.175535 | 0.000493  |
| C | 6.066114  | -0.024514 | 0.000415  |
| C | 6.713956  | 1.240493  | 0.001655  |
| H | 7.797331  | 1.292822  | 0.001944  |
| C | 5.959087  | 2.394315  | 0.002610  |
| H | 6.459073  | 3.356375  | 0.003725  |
| C | 4.538401  | 2.374617  | 0.002215  |
| H | 4.021234  | 3.323565  | 0.003320  |
| C | 4.499094  | -2.399469 | -0.001627 |

---

|   |           |           |           |
|---|-----------|-----------|-----------|
| H | 3.962041  | -3.337447 | -0.002546 |
| C | 3.857780  | -1.175530 | -0.000685 |
| C | -6.692277 | -1.300643 | 0.001134  |
| H | -7.774666 | -1.370737 | 0.001368  |
| C | 5.919073  | -2.442517 | -0.001532 |
| H | 6.403410  | -3.412465 | -0.002284 |
| C | 6.692271  | -1.300645 | -0.000484 |
| H | 7.774660  | -1.370743 | -0.000357 |
| N | 0.000018  | -3.508054 | -0.000107 |
| H | -0.000001 | 4.625041  | -0.002114 |

## TD-DFT calculations

Table S13: Calculated TD-DFT transitions of compound **3a** at B3LYP/6-31+G(d,p) level (IEFPCM).

| S <sub>n</sub> | E (eV) | λ (nm) | f      | Configuration | CI coefficient |
|----------------|--------|--------|--------|---------------|----------------|
| S <sub>1</sub> | 2.3758 | 521.87 | 0.1339 | HOMO → LUMO   | 0.69450        |
| S <sub>2</sub> | 2.4895 | 498.04 | 0.0003 | HOMO-2 → LUMO | 0.11417        |
|                |        |        |        | HOMO → LUMO+1 | 0.69364        |
| S <sub>3</sub> | 2.9490 | 420.43 | 0.3802 | HOMO-1 → LUMO | 0.68175        |
|                |        |        |        | HOMO → LUMO+2 | -0.16082       |
| S <sub>4</sub> | 3.0002 | 413.25 | 0.0000 | HOMO-2 → LUMO | 0.69062        |
|                |        |        |        | HOMO → LUMO+2 | -0.11803       |

Table S14: Calculated TD-DFT transitions of compound **3b** at B3LYP/6-31+G(d,p) level (IEFPCM).

| S <sub>n</sub> | E (eV) | λ (nm) | f      | Configuration | CI coefficient |
|----------------|--------|--------|--------|---------------|----------------|
| S <sub>1</sub> | 2.4183 | 512.70 | 0.1342 | HOMO → LUMO   | 0.69355        |
| S <sub>2</sub> | 2.5477 | 486.66 | 0.0019 | HOMO-2 → LUMO | -0.11298       |
|                |        |        |        | HOMO → LUMO+1 | 0.68969        |
| S <sub>3</sub> | 2.9958 | 413.86 | 0.0000 | HOMO-2 → LUMO | 0.63832        |
|                |        |        |        | HOMO-1 → LUMO | -0.25522       |
|                |        |        |        | HOMO → LUMO+1 | 0.13521        |
| S <sub>4</sub> | 3.0538 | 406.00 | 0.2972 | HOMO-2 → LUMO | 0.24843        |
|                |        |        |        | HOMO-1 → LUMO | 0.60960        |
|                |        |        |        | HOMO → LUMO+2 | 0.22241        |



# 1H-, 13C- and NOESY-NMR Spectra of unknown compounds

## 4-chloro-3,5-bis((8-chloronaphthalen-1-yl)ethynyl)pyridine (**S3b**)

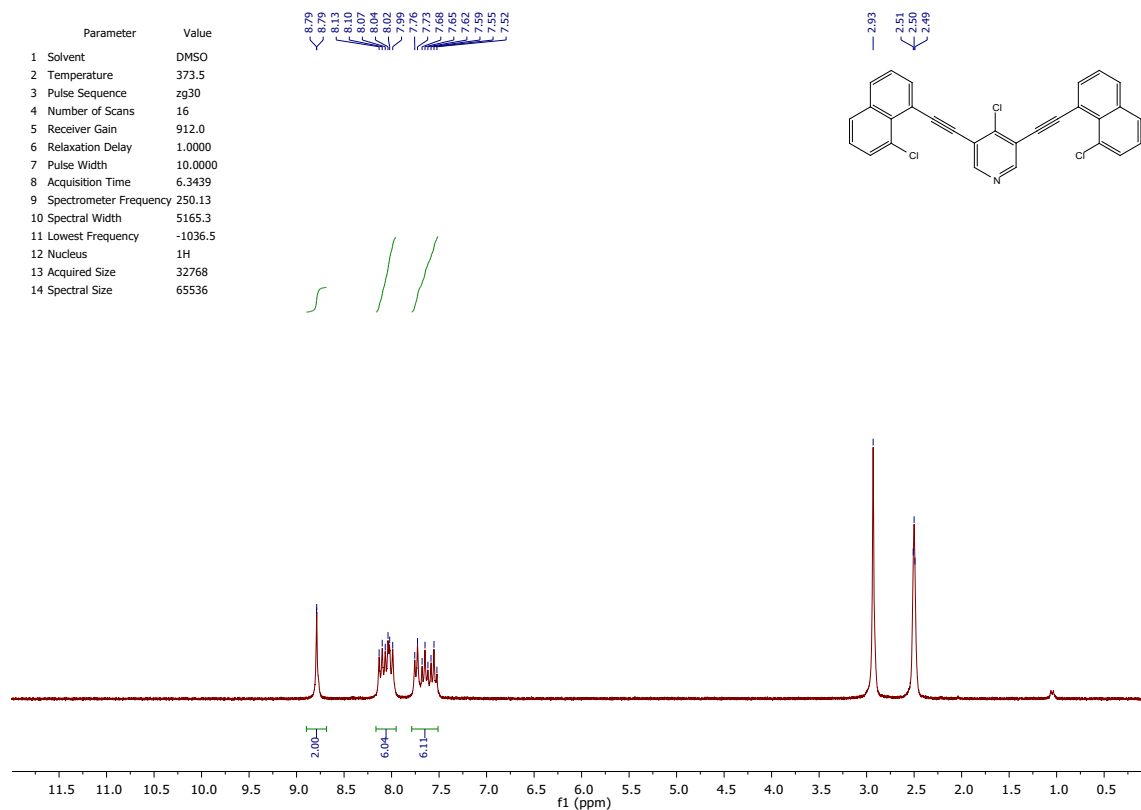

Figure S3: <sup>1</sup>H-NMR of **S3b**

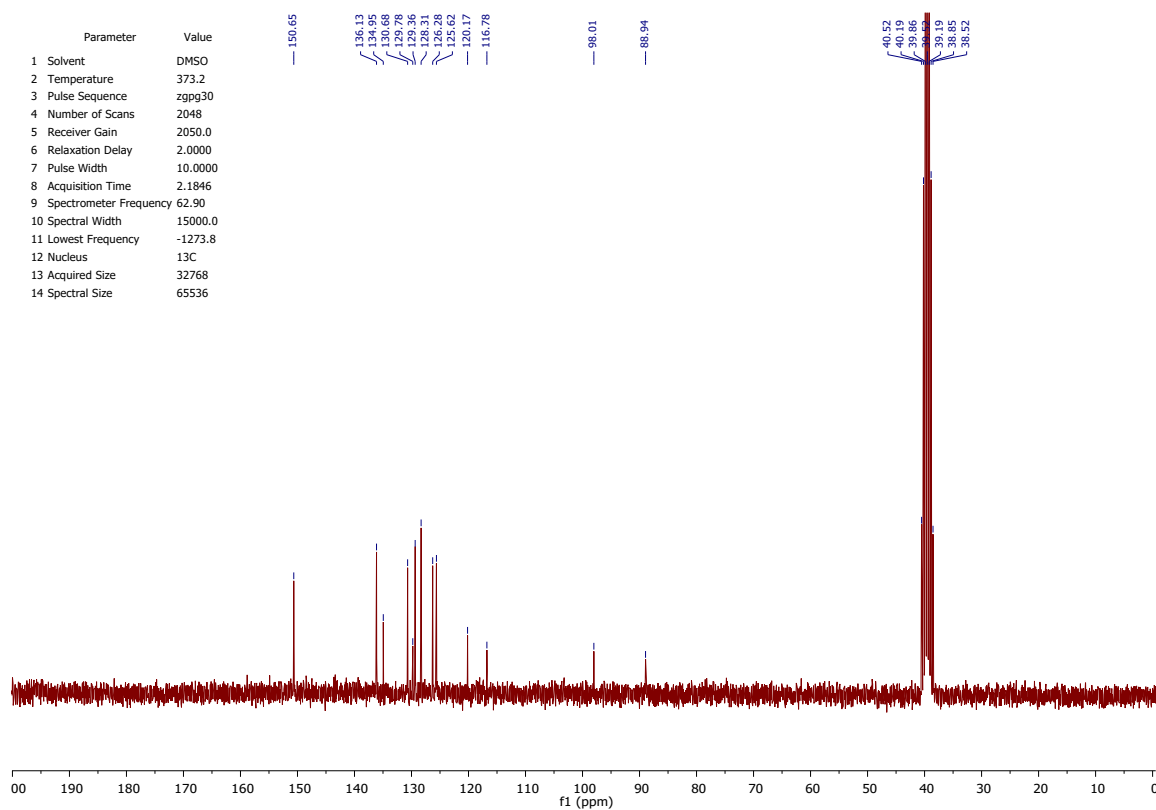

Figure S4: <sup>13</sup>C-NMR of **S3b**

8,8'-((4'-(*tert*-butyl)-[1,1'-biphenyl]-2,6-diyl)bis(ethyne-2,1-diyl))bis(1-chloronaphthalene) (**1a**)

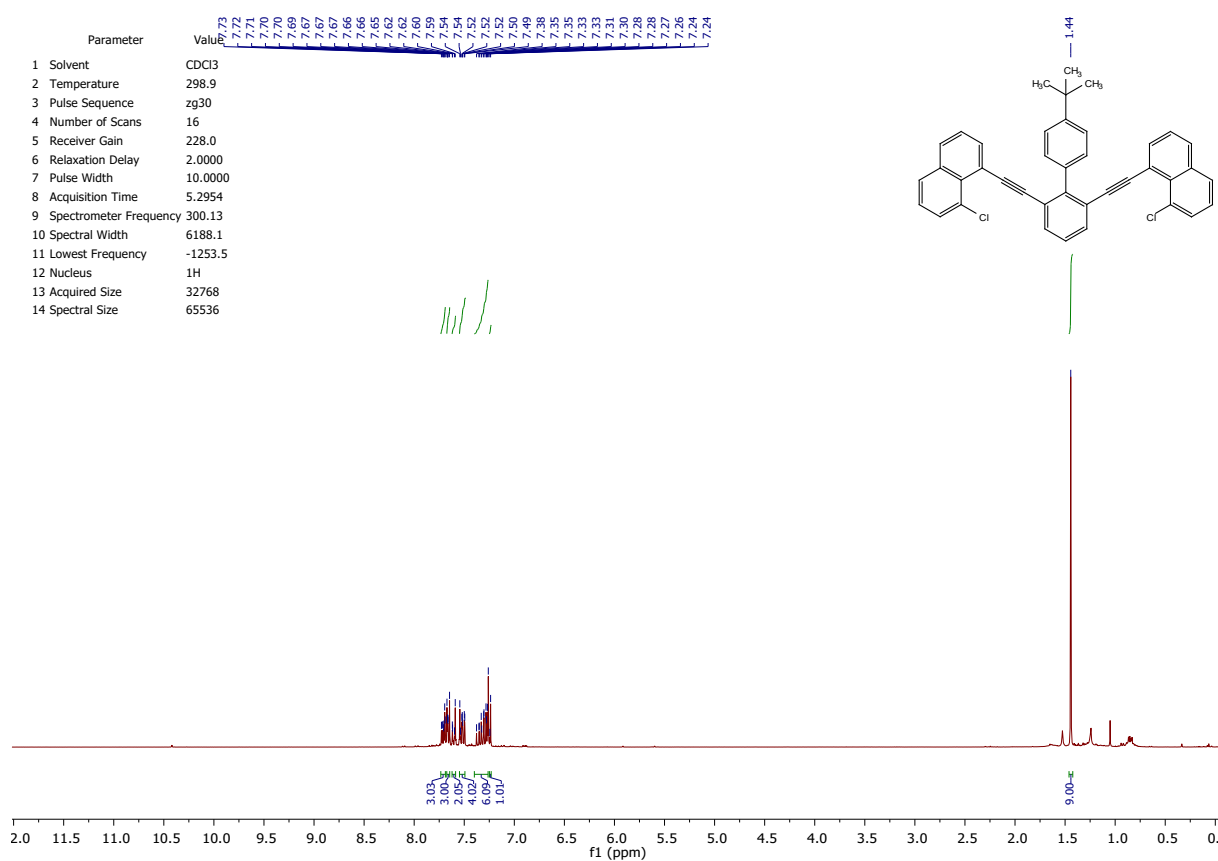

Figure S5: <sup>1</sup>H-NMR of **1a**

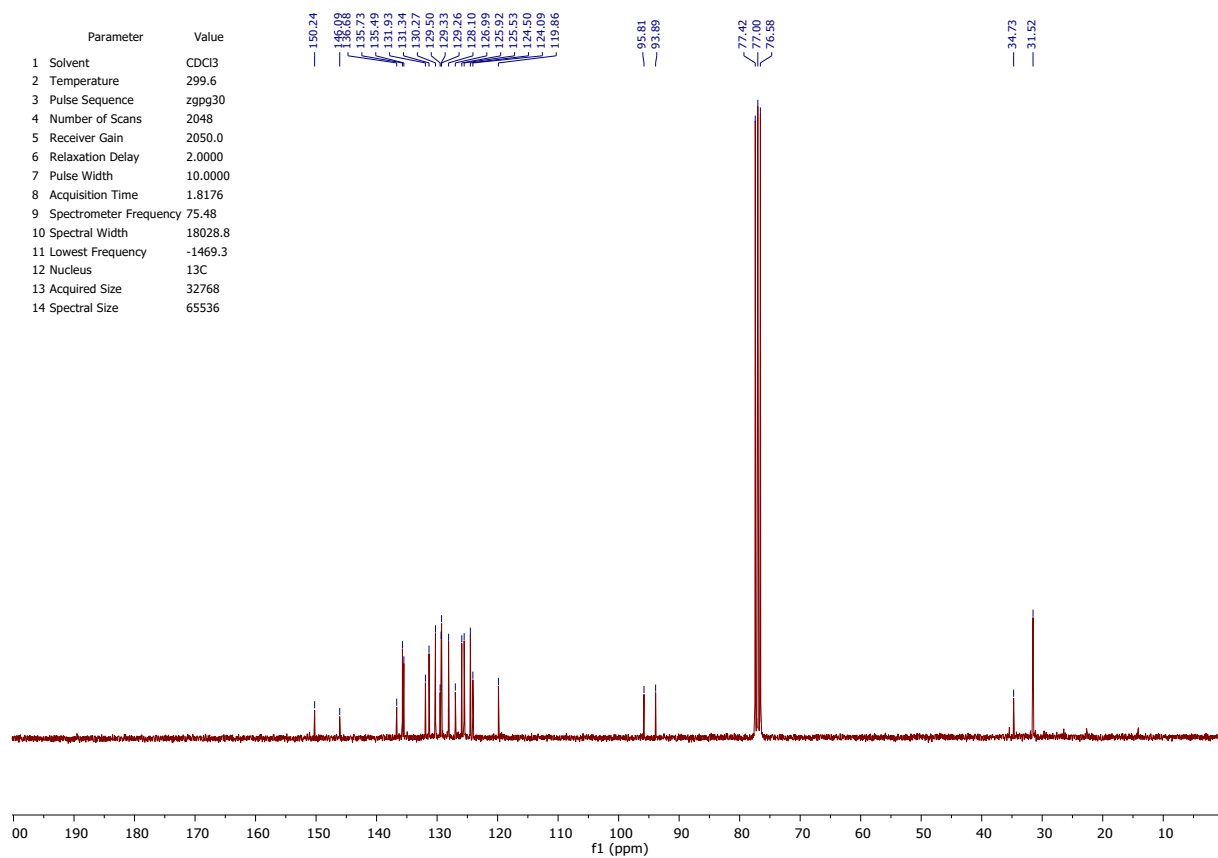

Figure S6: <sup>13</sup>C-NMR of **1a**

### 4-(4-(*tert*-butyl)phenyl)-3,5-bis((8-chloronaphthalen-1-yl)ethynyl)pyridine (**1b**)

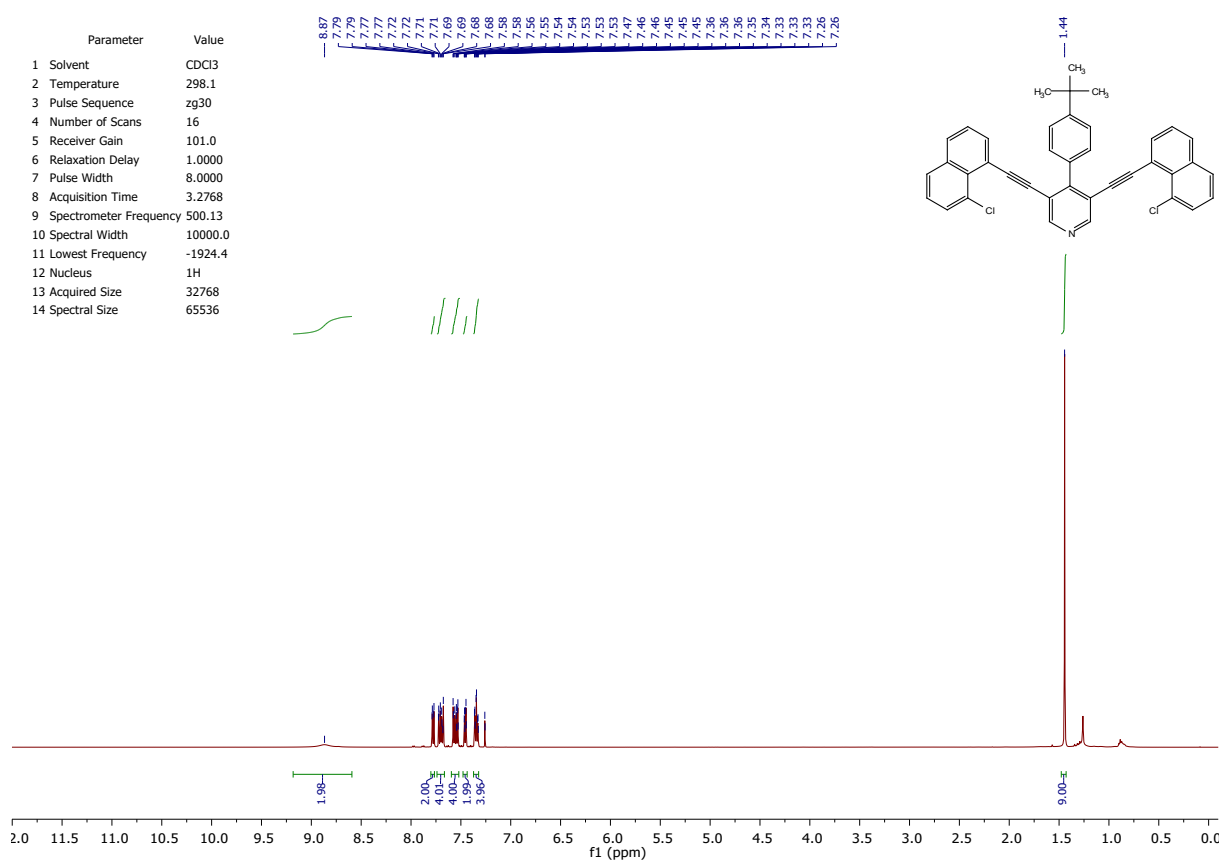

Figure S7: <sup>1</sup>H-NMR of **1b**

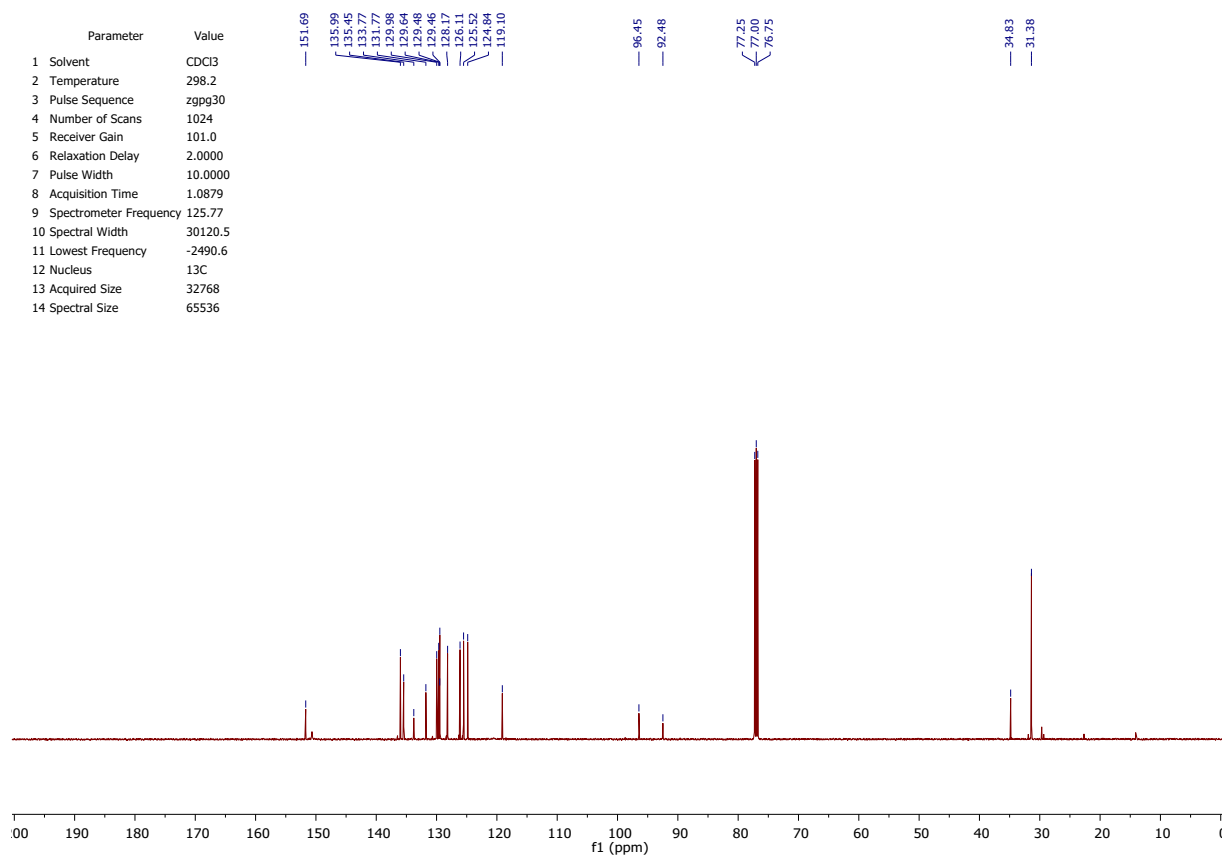

Figure S8: <sup>13</sup>C-NMR of **1b**

## 2-(tert-butyl)-4,10-bis(8-chloronaphthalen-1-yl)pyrene (2a)

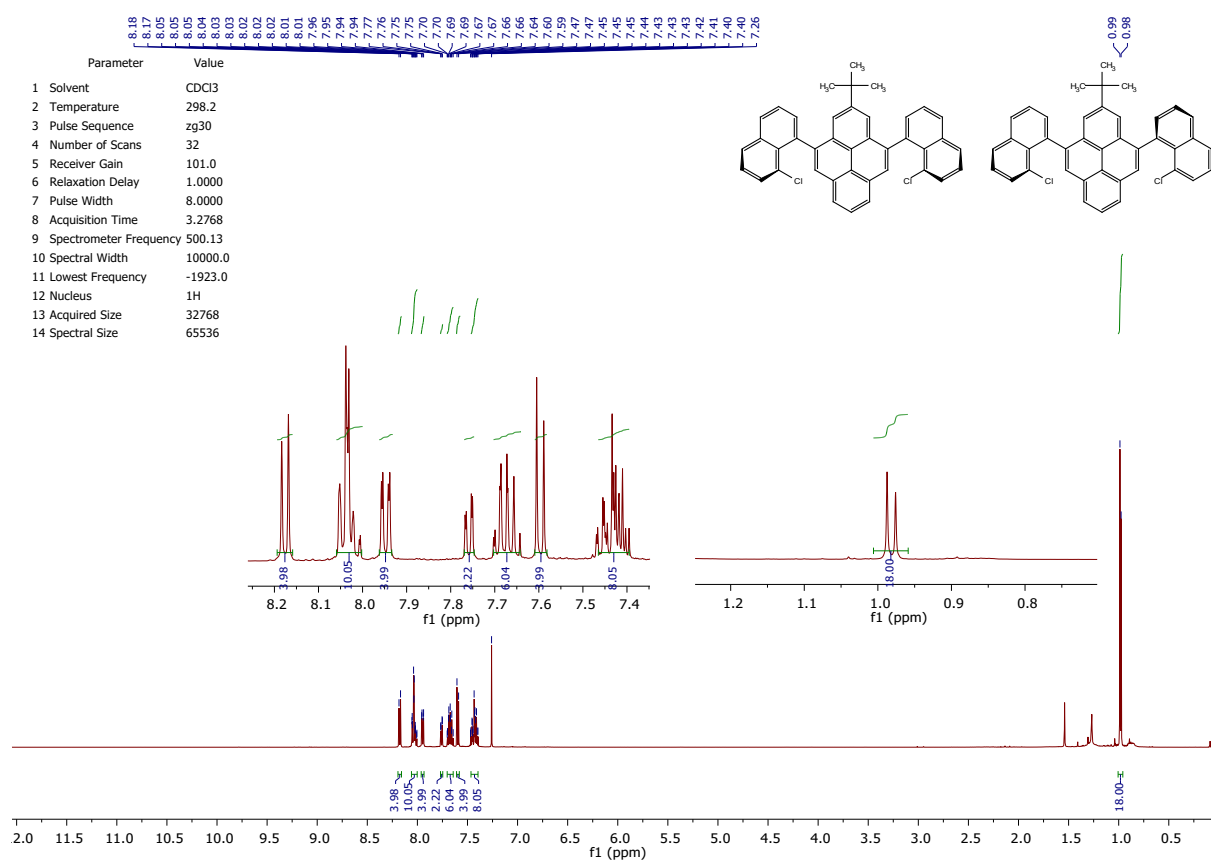

Figure S9: <sup>1</sup>H-NMR of 2a

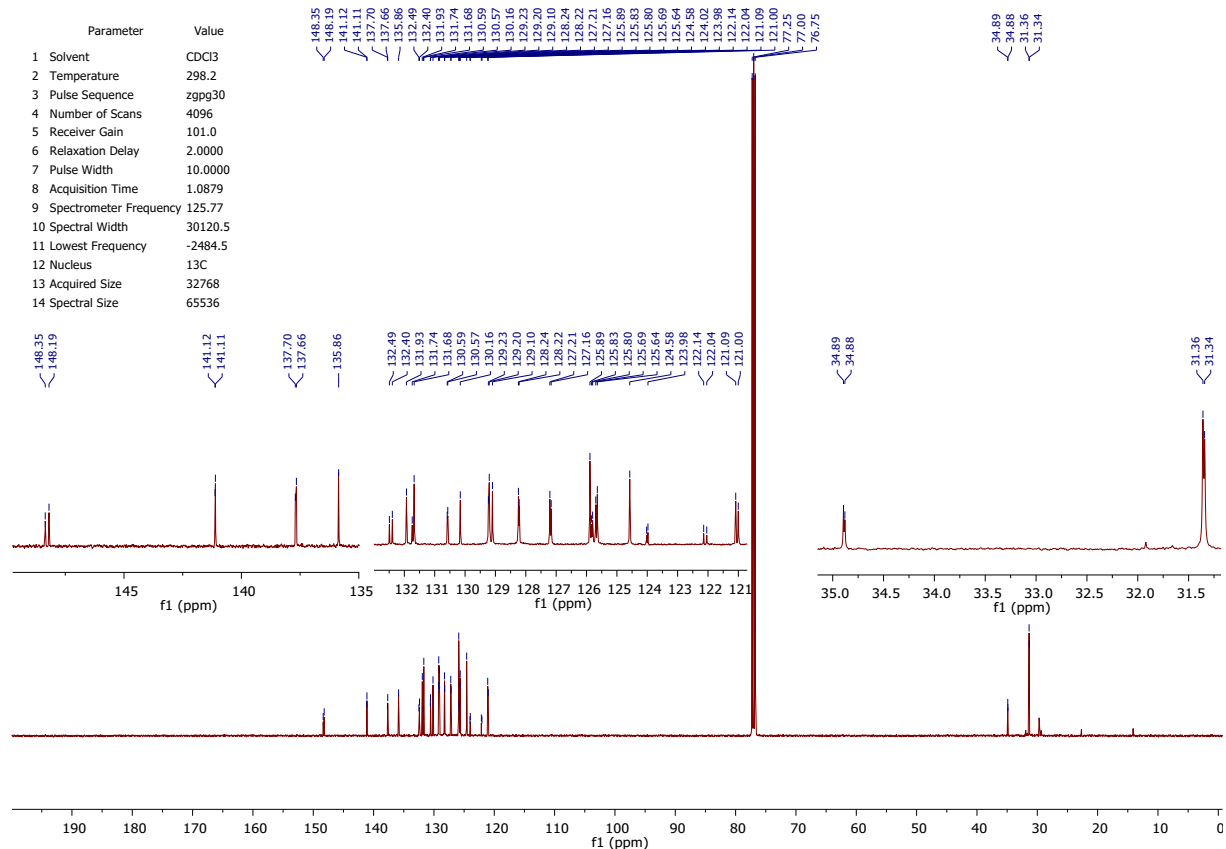

Figure S10: <sup>13</sup>C-NMR of 2a

## 7-(*tert*-butyl)-5,9-bis(8-chloronaphthalen-1-yl)naphtho[2,1,8-*def*]isoquinoline (**2b**)

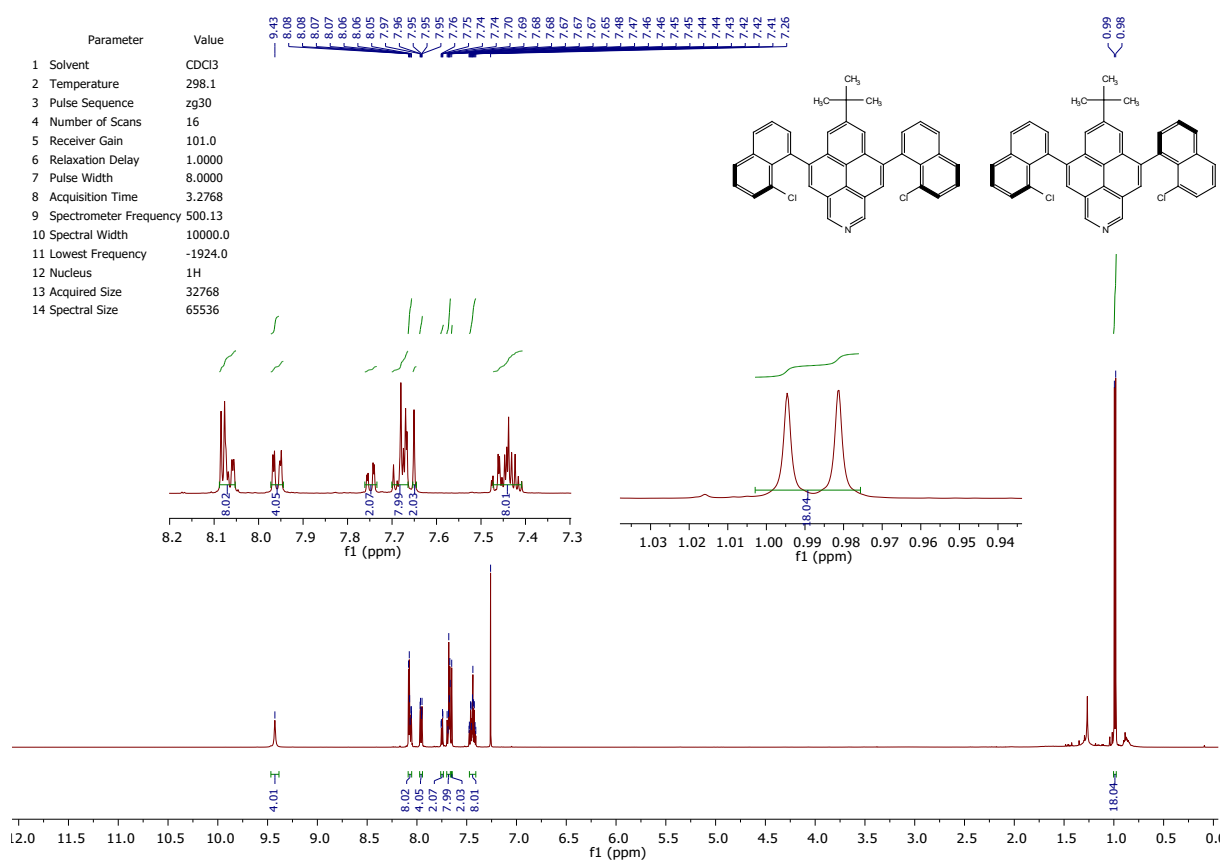

Figure S11: <sup>1</sup>H-NMR of **2b**

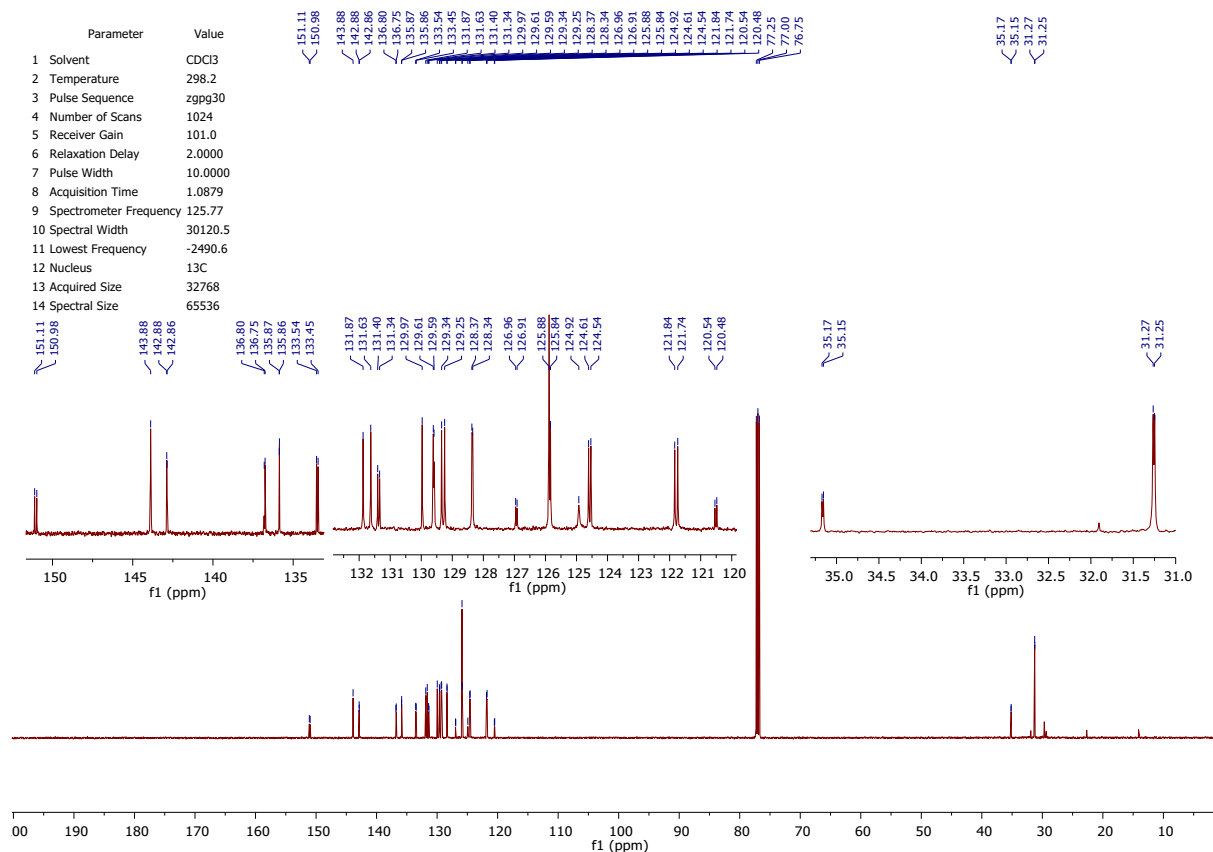

Figure S12: <sup>13</sup>C-NMR of **2b**



# 8-(*tert*-butyl)diacenaphtho[1,2-*e*:1',2'-]pyrene (**3a**)

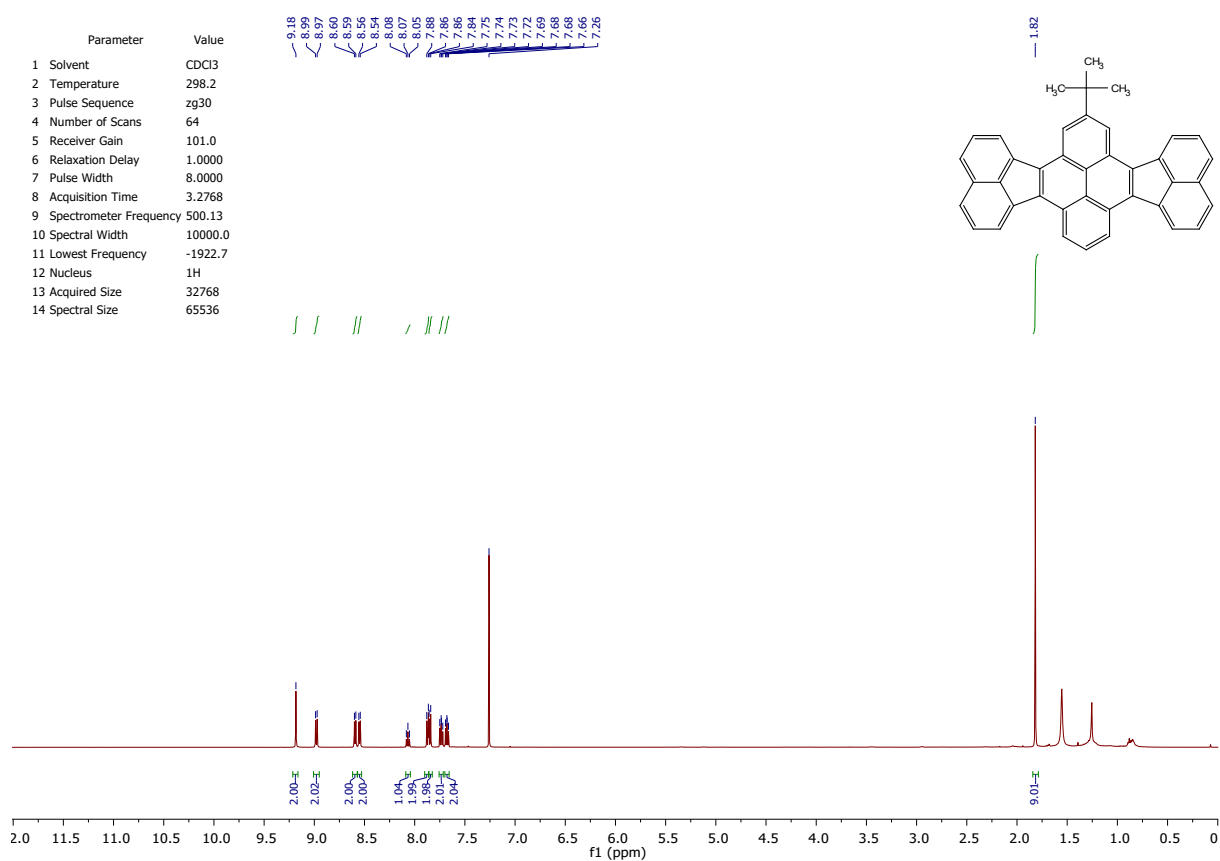

Figure S13: <sup>1</sup>H-NMR of **3a**

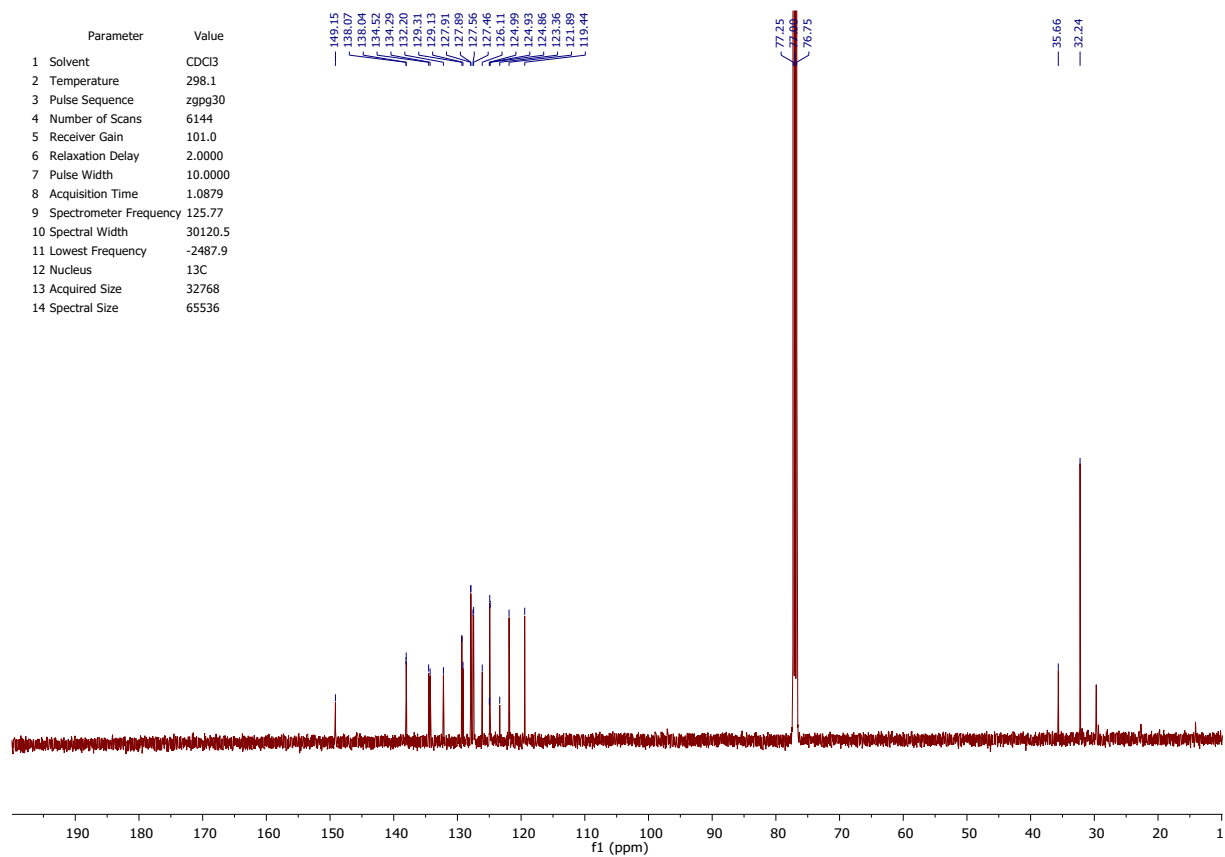

Figure S14: <sup>13</sup>C-NMR of **3a**

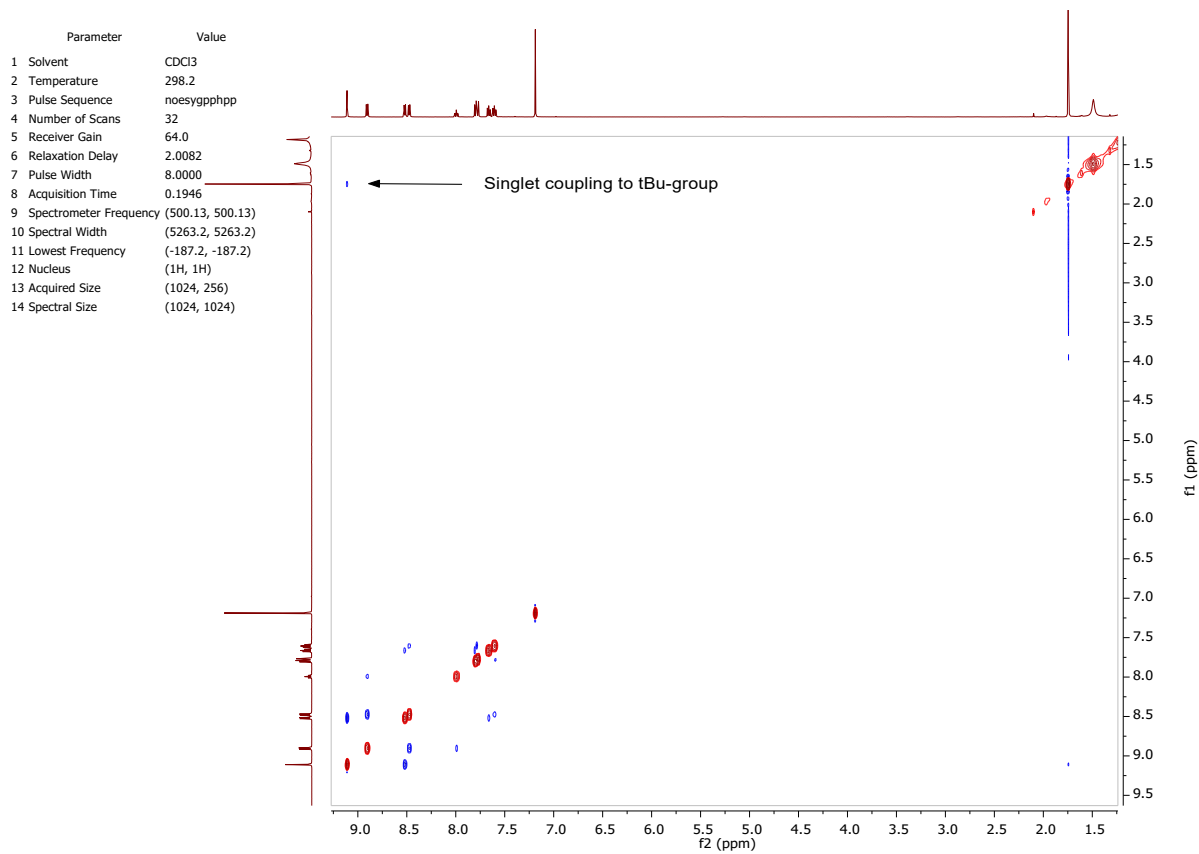

Figure S15: NOESY-NMR of **3a**

17-(*tert*-butyl)acenaphtho[1',2':3,4]naphtho[2,1,8-*def*]acenaphtho[1,2-*h*]isoquinoline (**3b**)

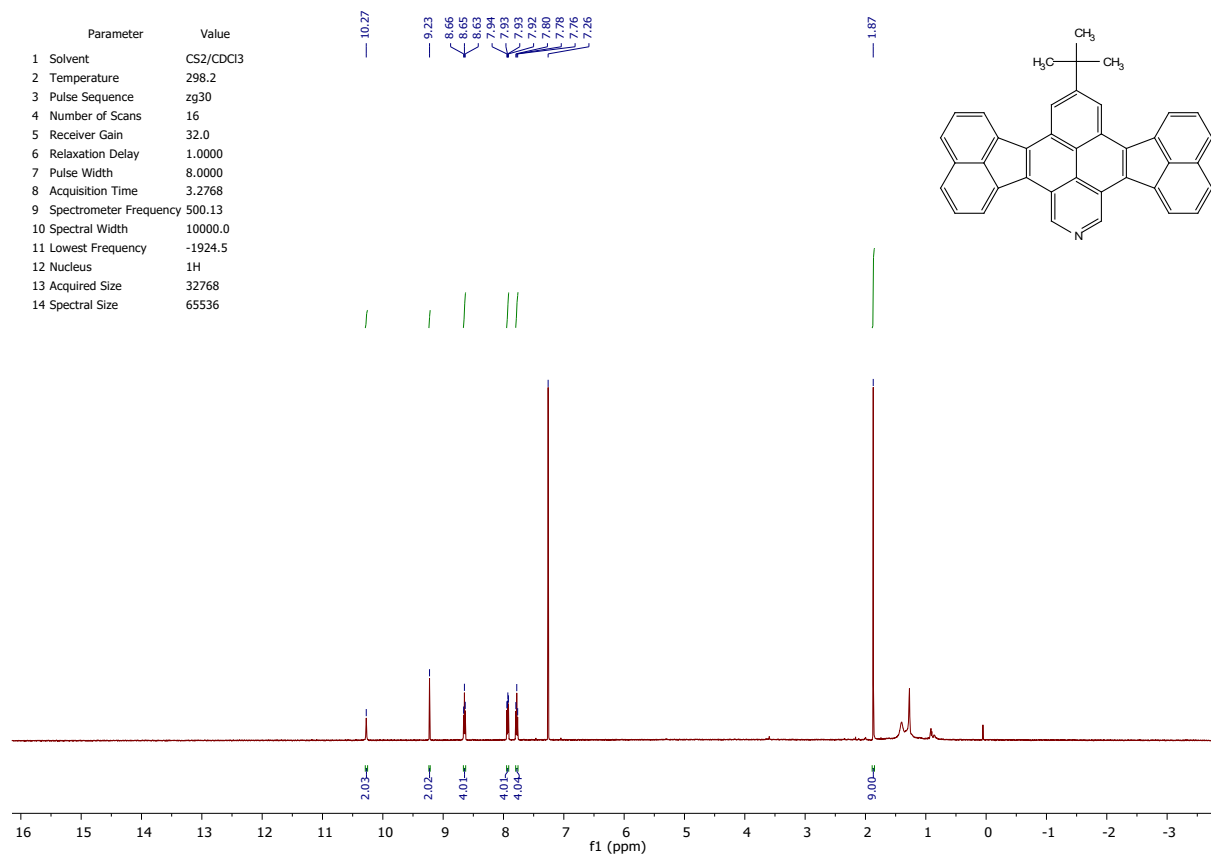

Figure S16: <sup>1</sup>H-NMR of **3b**

## References

- (1) Molenda, R.; Boldt, S.; Villinger, A.; Ehlers, P.; Langer, P. Synthesis of 2-Azapyrenes and Their Photophysical and Electrochemical Properties. *J. Org. Chem.* **2020**, *85*, 12823–12842.
- (2) Chang, N.; Chen, X.; Nonobe, H.; Okuda, Y.; Mori, H.; Nakajima, K.; Nishihara, Y. Synthesis of substituted picenes through Pd-catalyzed cross-coupling reaction/annulation sequences and their physicochemical properties. *Org. Lett.* **2013**, *15*, 3558–3561.
- (3) Kamikawa, K.; Takemoto, I.; Takemoto, S.; Matsuzaka, H. Synthesis of helicenes utilizing palladium-catalyzed double C-H arylation reaction. *J. Org. Chem.* **2007**, *72*, 7406–7408.
- (4) Michalsky, I.; Gensch, V.; Walla, C.; Hoffmann, M.; Rominger, F.; Oeser, T.; Tegeder, P.; Dreuw, A.; Kivala, M. Fully Bridged Triphenylamines Comprising Five- and Seven-Membered Rings. *Chem. Eur. J.* **2022**, *28*, e202200326.
- (5) Dumsloff, T.; Yang, B.; Maghsoumi, A.; Velpula, G.; Mali, K. S.; Castiglioni, C.; Feyter, S. de; Tommasini, M.; Narita, A.; Feng, X.; Müllen, K. Adding Four Extra K-Regions to Hexa-peri-hexabenzocoronene. *J. Am. Chem. Soc.* **2016**, *138*, 4726–4729.
- (6) Jurok, R.; Cibulka, R.; Dvořáková, H.; Hampl, F.; Hodačová, J. Planar Chiral Flavinium Salts - Prospective Catalysts for Enantioselective Sulfoxidation Reactions. *Eur. J. Org. Chem.* **2010**, *2010*, 5217–5224.
- (7) Wang, B.; Daugulis, O.; Brookhart, M. Ethylene Polymerization with Ni(II) Diimine Complexes Generated from 8-Halo-1-naphthylamines: The Role of Equilibrating Syn / Anti Diastereomers in Determining Polymer Properties. *Organometallics* **2019**, *38*, 4658–4668.
- (8) Noland, W. E.; Narina, V. S.; Britton, D. Synthesis and Crystallography of 8-Halonaphthalene-1-Carbonitriles and Naphthalene-1,8-Dicarbonitrile. *J. Chem. Res.* **2011**, *35*, 694–697.
- (9) Komatsu, H.; Ikeuchi, T.; Tsuno, H.; Arichi, N.; Yasui, K.; Oishi, S.; Inuki, S.; Fukazawa, A.; Ohno, H. Construction of Tricyclic Nitrogen Heterocycles by a Gold(I)-Catalyzed Cascade Cyclization of Allenynes and Application to Polycyclic  $\pi$ -Electron Systems. *Angew. Chem. Int. Ed.* **2021**, *60*, 27019–27025.
- (10) Rajca, A.; Boratyński, P. J.; Olankitwanit, A.; Shiraishi, K.; Pink, M.; Rajca, S. Ladder oligo(m-aniline)s: derivatives of azaacenes with cross-conjugated  $\pi$ -systems. *J. Org. Chem.* **2012**, *77*, 2107–2120.
- (11) Machuy, M.; Würtele, C.; Schreiner, P. 2,6-Bis(phenylethynyl)biphenyls and Their Cyclization to Pyrenes. *Synth.* **2012**, *44*, 1405–1409.
- (12) Brouwer, A. M. Standards for photoluminescence quantum yield measurements in solution (IUPAC Technical Report). *Pure Appl. Chem.* **2011**, *83*, 2213–2228.

- (13) Frisch, M. J.; Trucks, G. W.; Schlegel, H. B.; Scuseria, G. E.; Robb, M. A.; Cheeseman, J. R.; Scalmani, G.; Barone, V.; Petersson, G. A.; Nakatsuji, H.; Li, X.; Caricato, M.; Marenich, A. V.; Bloino, J.; Janesko, B. G.; Gomperts, R.; Mennucci, B.; Hratchian, H. P.; Ortiz, J. V.; Izmaylov, A. F.; Sonnenberg, J. L.; Williams; Ding, F.; Lipparini, F.; Egidi, F.; Goings, J.; Peng, B.; Petrone, A.; Henderson, T.; Ranasinghe, D.; Zakrzewski, V. G.; Gao, J.; Rega, N.; Zheng, G.; Liang, W.; Hada, M.; Ehara, M.; Toyota, K.; Fukuda, R.; Hasegawa, J.; Ishida, M.; Nakajima, T.; Honda, Y.; Kitao, O.; Nakai, H.; Vreven, T.; Throssell, K.; Montgomery Jr., J. A.; Peralta, J. E.; Ogliaro, F.; Bearpark, M. J.; Heyd, J. J.; Brothers, E. N.; Kudin, K. N.; Staroverov, V. N.; Keith, T. A.; Kobayashi, R.; Normand, J.; Raghavachari, K.; Rendell, A. P.; Burant, J. C.; Iyengar, S. S.; Tomasi, J.; Cossi, M.; Millam, J. M.; Klene, M.; Adamo, C.; Cammi, R.; Ochterski, J. W.; Martin, R. L.; Morokuma, K.; Farkas, O.; Foresman, J. B.; Fox, D. J. *Gaussian 16 Rev. C.01*, Wallingford, CT, 2016.
- (14) Paenurk, E.; Gershoni-Poranne, R. Simple and efficient visualization of aromaticity: bond currents calculated from NICS values. *Phys. Chem. Chem. Phys.* **2022**, *24*, 8631–8644.
